# Supplementary material for: High Trans-ethnic Replicability of GWAS Results Implies Common Causal Variants
Source: PLoS Genet. 2013 Jun 13;9(6):e1003566. doi: 10.1371/journal.pgen.1003566 (PMC3681663; doi:10.1371/journal.pgen.1003566)
Supplement: Table S4 — List of genome-wide significant associated SNPs and ongoing replication attempts gathered. (XLSX) [file pgen.1003566.s004.xlsx]

## Sheet: Hoja1
	Supplementary Table 4: List of genome-wide significant associated SNPs and ongoing replication attempts gathered
	Disa	Nb	Reg	Loci	SNP	Refb	All	Anc	Risk	Initc	Statusd	GWAS	OR	CI	Pval	Shifte	OR?f
	AD	1	2q34	PECR	rs7590720	G	A/G	A	DER	N	DiscEuro	Treutlein	1.27	1.11-1.47	1e-08	N	Rep
										N	Euro	Bierut	0.94	0.84-1.05	0.24		Comb
	AD	2	12q24.13	ALDH2	rs2074356	T	C/T	C	DER	Y	DiscEasia	Baik	-0.91 (β)	±0.10	9e-59	N	Rep
					rs671	A	A/G	G	DER	Y	DiscEasia	Takeuchi	0.16	0.14-0.18	4e-211	N	Rep
	AD	3	4	ADH1B/C	rs1789891	A	A/C	C	DER	Y	DiscEuro	Frank	1.46	1.28-1.67	1e-08	N	GWAS
	AMD	1	1q31.1	CFH	rs380390	C	-	-	-	Y	DiscEuro	Klein	0.22	0.09-0.5	4e-08	N	GWAS
					rs572515	-	-	-	-	N	DiscEuro	Neale	-	-	2e-43	N	GWAS
					rs10737680	A	A/C	A	ANC	N	DiscEuro	Chen	0.32	0.28-0.36	2e-76	Y	GWAS
					rs1061170	C	C/T	T	DER	N	DiscEuro	Yu	2.21	-	1e-261	N	Rep
					rs800292	G	A/G	A	DER	Y	DiscEasia	Arakawa	0.56	-	4e-15	N	GWAS
	AMD	2	10q26	ARMS2-HTR1A	rs10490924	T	G/T	G	DER	Y	DiscEasia	DeWan	1.67	0.75-3.70	4e-12	N	GWAS
										Y	Euro	Neale	-	-	2e-41		GWAS
										Y	Euro	Kopplin	3.38	-	3e-15		GWAS
										Y	Euro	Yu	3.19	-	1e-144		GWAS
										Y	Easia	Arakawa	1.32	-	9e-29		GWAS
					rs3793917	G	C/G	G	ANC	Y	DiscEuro	Chen	3.4	2.94-3.94	4e-60	N	GWAS
										Y	Euro	Kopplin	3.18	-	1e-12		GWAS
	AMD	3	22	TIMP3	rs9621532	A	A/C	A	ANC	N	DiscEuro	Neale	0.62	0.53-0.73	4e-09	N	Comb
										N	Euro	Chen	0.55	0.44-0.70	4e-05		GWAS
										N	Euro	Yu	0.45	-	0.0004		GWAS
										N	Easia	Arakawa	0.97	-	0.71		GWAS
	AMD	4	15q22	LIPC	rs10468017	C	C/T	C	ANC	N	DiscEuro	Neale	0.82	0.77-0.86	1e-08	N	Comb
										N	Euro	Chen	-	-	0.002		GWAS
										N	Euro	Yu	0.83	-	5e-05		GWAS
										N	Easia	Arakawa	0.91	-	0.24		GWAS
	AMD	5	19	C3	rs2230199	C	C/G	G	DER	Y	DiscEuro	Chen	1.74	1.47-2.06	1e-10	N	Comb
										N	Euro	Kopplin	1.86	-	8e-05		GWAS
										Y	Euro	Yu	1.68	-	1e-18		GWAS
	AMD	6	6q21	FRK-COL10A1	rs1999930	C	C/T	C	ANC	Y	DiscEuro	Yu	0.9	-	1e-08	N	Rep
	AMD	7	6p12	VEGFA	rs4711751	T	C/T	T	ANC	N	DiscEuro	Yu	1.13	1.06-1.19	9e-09	N	Rep
	AMD	8	4	CFI	rs10033900	T	C/T	T	ANC	N	DiscEuro	Yu	1.18	-	4e-10	N	Rep
										N	Easia	Arakawa	0.87	-	0.004	Shift	GWAS
	AMD	9	16	CETP	rs3764261	A	A/C	C	DER	N	DiscEuro	Yu	1.14	-	7e-09	N	Rep
	AMD	10	8p21	TNFRSF10A	rs13278062	T	G/T	G	DER	N	DiscEasia	Arakawa	1.35	1.22-1.51	1e-12	Y	Rep
	AMD	11	4q12	Several	rs1713985	G	G/T	T	DER	N	DiscEasia	Arakawa	1.27	1.13-1.43	2e-08	N	Rep
	RA	1	1p13	PTPN22	rs6679677	A	A/C	C	DER	Y	DiscEuro	WTCCC	1.98	1.72-2.27	5e-26	N	GWAS
										Y	Euro	Raychaudhuri	1.79	1.65-1.94	6e-42		GWAS
					rs2476601	A	A/G	G	DER	Y	DiscEuro	Plenge-NEJM	1.72	-	2e-11	N	GWAS
										Y	Euro	Gregersen	1.81	-	5e-27		GWAS
										Y	Euro	Stahl	1.94	1.81-2.08	9e-74		GWAS
	RA	2	9q33	TRAF1, C5, PHF19	rs3761847	G	A/G	G	ANC	N	DiscEuro	Plenge-NEJM	1.4	1.18-1.58	4e-14	N	Rep
										N	Euro	Stahl	1.13	1.08-1.18	2e-07		GWAS
										N	Easia	Kochi	1.05	0.99-1.12	0.12		Comb
					rs881375	T	C/T	C	DER	Y	DiscEuro	Gregersen	1.26	-	5e-10	N	GWAS
										N	Easia	Freudenberg	1.27	-	0.003		GWAS
	RA	3	6q23	TNFAIP3, OLIG3	rs10499194	C	C/T	C	ANC	N	DiscEuro	Plenge-NG	0.69	0.58-0.82	3e-08	N	Rep
										N	Euro	Stahl	0.91	0.87-0.96	0.0007		GWAS
					rs6920220	A	A/G	G	DER	Y	DiscEuro	Raychaudhuri	1.24	1.16-1.32	2e-09	N	Comb
										Y	Euro	Stahl	1.22	1.16-1.29	9e-13		GWAS
	RA	4	1p36	MMEL1, TNFRSF14	rs3890745	T	C/T	C	DER	N	DiscEuro	Raychaudhuri	0.92	-	1e-07	N	Rep
										N	Euro	Stahl	0.89	0.85-0.94	4e-06		GWAS
	RA	5	9p13	CCL21	rs2812378	G	A/G	A	DER	N	DiscEuro	Raychaudhuri	1.1	-	3e-07	N	Rep
										N	Euro	Stahl	1.1	1.05-1.16	0.0001		GWAS
					rs951005	A	A/G	A	ANC	N	DiscEuro	Stahl	0.87	0.81-0.93	4e-10	N	Rep
	RA	6	12q13	KIF5A, PIP4K2C	rs1678542	C	C/G	G	DER	N	DiscEuro	Raychaudhuri	0.92	-	9e-08	N	Rep
										N	Euro	Stahl	0.91	0.87-0.96	0.0002		GWAS
	RA	7	20q13	CD40	rs4810485	G	G/T	G	ANC	Y	DiscEuro	Raychaudhuri	0.91	-	8e-09	N	Rep
										Y	Euro	Stahl	0.85	0.80-0.90	3e-09		GWAS
										N	Easia	Kochi	1.06	1.00-1.13	0.06		Comb
	RA	8	2p16	REL	rs13031237	A	A/C	C	DER	Y	DiscEuro	Gregersen	1.25	1.18-1.37	3e-14	N	Comb
										N	Euro	Stahl	1.13	1.07-1.18	8e-07		GWAS
										N	Easia	Kochi	0.94	0.80-1.10	0.45		Comb
	RA	9	2q33	CTLA4	rs231735	G	G/T	G	ANC	N	DiscEuro	Gregersen	0.86	0.80-0.94	6e-09	N	Comb
					rs3087243	G	A/G	G	ANC	Y	DiscEuro	Stahl	0.87	0.83-0.91	1e-08	N	GWAS
	RA	10	8p23	BLK	rs2736340	A	A/G	G	DER	N	DiscEuro	Gregersen	1.19	1.13-1.27	6e-09	N	Rep
										N	Euro	Stahl	1.12	1.07-1.18	2e-05		GWAS
										N	Easia	Freudenberg	0.79	-	0.004	Shift	GWAS
	RA	11	6q27	CCR6	rs3093024	T	C/T	T	ANC	Y	DiscEasia	Kochi	1.16	1.11-1.22	8e-19	N	Rep
										N	Easia	Freudenberg	1.23	-	0.004		GWAS
					rs3093023	A	A/G	G	DER	N	DiscEuro	Stahl	1.11	1.06-1.16	2e-11	N	Rep
										N	Easia	Freudenberg	1.24	-	0.003		GWAS
	RA	12	2q32	STAT4	rs7574865	T	G/T	T	ANC	N	DiscEuro	Stahl	1.16	1.10-1.23	3e-07	N	GWAS
										N	Easia	Kochi	1.17	1.10-1.25	2e-06		Comb
	RA	13	2q14	SPRED2	rs934734	G	A/G	A	DER	N	DiscEuro	Stahl	1.13	1.06-1.21	5e-10	N	Rep
	RA	14	5q11	ANKRD55, IL6ST	rs6859219	C	A/C	C	ANC	Y	DiscEuro	Stahl	0.85	0.78-0.93	1e-11	N	Rep
	RA	15	5q21	C5orf30	rs26232	C	C/T	C	ANC	N	DiscEuro	Stahl	0.93	0.88-0.98	4e-08	N	Rep
										N	Easia	Freudenberg	0.8	-	0.006		GWAS
	RA	16	3p14	PXK	rs13315591	C	C/T	T	DER	N	DiscEuro	Stahl	1.13	1.04-1.23	5e-08	N	Rep
	RA	17	4p15	RBPJ	rs874040	C	C/G	C	ANC	N	DiscEuro	Stahl	1.18	1.12-1.24	1e-16	N	Rep
	RA	18	7q32	IRF5	rs10488631	C	C/T	T	DER	N	DiscEuro	Stahl	1.25	1.14-1.37	4e-11	N	Rep
	RA	19	2q11	AFF3	rs11676922	T	A/T	A	DER	N	DiscEuro	Stahl	1.15	1.10-1.20	1e-14	N	Rep
	RA	20	10p15	IL2RA	rs706778	T	C/T	T	ANC	N	DiscEuro	Stahl	1.11	1.06-1.17	1e-11	N	Rep
	RA	21	14q24	BATF	rs7155603	G	A/G	A	DER	N	DiscEuro	Stahl	1.12	1.04-1.20	1e-07	N	Rep
	RA	22	1	PADI4	rs2240335	G	G/T	G	ANC	Y	DiscEasia	Freudenberg	1.5	-	2e-08	N	GWAS
										Y	Easia	Terao	-	-	2e-08		GWAS
	RA	23	21q22	AIRE	rs2075876	A	A/G	G	DER	N	DiscEasia	Terao	1.18	1.07-1.31	4e-09	N	Rep
	OA	1	3q24.3	DVWA	rs7639618	C	C/T	C	ANC	N	DiscEasia	Miyamoto	0.69	0.61-0.79	7e-11	Y	Comb
										N	Euro	Kerkhof	1.1	0.90-1.20	0.53		GWAS
	OA	2	7q22	COG5-DUS4L	rs3815148	C	A/C	C	ANC	N	DiscEuro	Kerkhof	1.14	1.09-1.19	8e-08	N	Comb
										N	Euro	Panoutsopoulou	1.07	0.99-1.15	0.08		GWAS
					rs4730250	G	A/G	A	DER	N	DiscEuro	Evangelou	1.17	1.11-1.24	9e-09	N	Comb
	OA	3	13q34	MCF2L	rs11842874	A	A/G	G	DER	N	DiscEuro	Day-Williams	0.85	0.81-0.90	2e-08	Y	Comb
	AS	1	17q21	ORMDL3	rs7216389	T	C/T	T	ANC	Y	DiscEuro	Moffatt	1.45	1.17-1.81	3e-09	N	Rep
										N	Euro	Himes	-	-	0.002		GWAS
										Y	Euro	Sleiman	1.25	-	2e-07		GWAS
										N	Euro	Li	-	-	0.06		GWAS
										N	Euro	DeWan	1.1	0.80-1.50	0.013		GWAS
										N	Euro	Ferreira	1.25	1.12-1.40	6e-05		GWAS
										Y	Euro	Torgerson	1.35	-	2e-07		GWAS
										N	Africa	Torgerson	-	-	0.0969		GWAS
										N	Easia	Noguchi	0.87	-	0.028	Shift	GWAS
					rs8071050	G	A/G	G	ANC	Y	DiscEuro	Ferreira (2)	1.27	1.18-1.35	6e-10	N	GWAS
	AS	2	5q12	PDE4D	rs1588265	A	A/G	A	ANC	Y	DiscEuro	Himes	0.88	0.83-0.94	3e-08	N	Rep
										N	Euro	Li	-	-	0.51		GWAS
										N	Euro	Ferreira	1.05	0.93-1.18	0.43		GWAS
										N	Easia	Noguchi	1.1	-	0.12	Shift	GWAS
										N	Euro	Ferreira (2)	1.06	0.97-1.16	0.22		GWAS
	AS	3	1q31	DENND1B	rs2786098	C	A/C	C	ANC	Y	DiscEuro	Sleiman	0.7	0.63-0.78	9e-11	N	Comb
										N	Euro	Torgerson	-	-	0.67		GWAS
										N	Africa	Torgerson	-	-	0.12		GWAS
										N	Easia	Noguchi	0.95	-	0.45		GWAS
	AS	4	5q31.1	RAD50-IL13	rs2244012	C	C/T	C	ANC	Y	DiscEuro	Li	1.64	1.36-1.97	3e-07	N	GWAS
										N	Euro	Torgerson	-	-	0.67		GWAS
										N	Africa	Torgerson	-	-	0.06		GWAS
										N	Easia	Noguchi	1.16	-	0.025		GWAS
					rs1295686	T	C/T	T	ANC	Y	DiscEuro	Moffatt (2)	1.15	1.09-1.20	1e-07	Y	GWAS
										N	Easia	Hirota	1.04	0.95-1.14	0.37		GWAS
										N	Euro	Ferreira (2)	1.03	0.93-1.15	0.55		GWAS
	AS	5	2	IL18R1	rs3771166	G	A/G	A	DER	Y	DiscEuro	Moffatt (2)	0.87	0.83-0.91	3e-09	N	GWAS
										N	Easia	Hirota	1.03	0.93-1.16	0.54	Shift	GWAS
										N	Euro	Torgerson	-	-	0.034		GWAS
										N	Africa	Torgerson	-	-	0.017		GWAS
										N	Easia	Noguchi	0.89	-	0.13		GWAS
										N	Euro	Ferreira (2)	0.86	0.79-0.94	0.0005		GWAS
	AS	6	9	IL33	rs1342326	C	A/C	A	DER	Y	DiscEuro	Moffatt (2)	1.22	1.14-1.30	9e-10	N	GWAS
										N	Euro	Torgerson	-	-	0.07		GWAS
										N	Africa	Torgerson	-	-	0.31		GWAS
										N	Euro	Ferreira (2)	1.2	1.08-1.34	0.001		GWAS
	AS	7	15	SMAD3	rs744910	A	A/G	A	ANC	Y	DiscEuro	Moffatt (2)	0.9	0.86-0.94	4e-09	N	GWAS
										N	Easia	Hirota	1.12	1.03-1.23	0.01	Shift	GWAS
										N	Euro	Torgerson	-	-	0.0002		GWAS
										N	Africa	Torgerson	-	-	0.14		GWAS
										N	Easia	Noguchi	1.14	-	0.019	Shift	GWAS
										N	Euro	Ferreira (2)	0.94	0.86-1.01	0.15		GWAS
	AS	8	17	GSDMA	rs3894194	A	A/G	G	DER	Y	DiscEuro	Moffatt (2)	1.18	1.13-1.23	5e-09	N	GWAS
										N	Easia	Hirota	1	0.92-1.09	0.98		GWAS
										N	Euro	Torgerson	-	-	5.8e-06		GWAS
										N	Africa	Torgerson	-	-	0.24		GWAS
										N	Easia	Noguchi	1.02	-	0.67		GWAS
										Y	Euro	Ferreira (2)	1.26	1.16-1.37	7e-08		GWAS
	AS	9	22	IL2RB	rs2284033	G	A/G	G	ANC	Y	DiscEuro	Moffatt (2)	0.9	0.86-0.94	1e-08	N	GWAS
										N	Easia	Hirota	1.06	0.97-1.15	0.23	Shift	GWAS
										N	Euro	Torgerson	-	-	0.06		GWAS
										N	Africa	Torgerson	-	-	0.48		GWAS
										N	Easia	Noguchi	0.97	-	0.57	Shift	GWAS
										N	Euro	Ferreira (2)	0.9	0.83-0.98	0.013		GWAS
	AS	10	5	SLC22A5	rs2073643	T	C/T	T	ANC	Y	DiscEuro	Moffatt (2)	0.9	0.86-0.94	2e-07	N	GWAS
										N	Easia	Hirota	1	0.91-1.10	1	Shift	GWAS
										N	Euro	Torgerson	-	-	0.19		GWAS
										N	Africa	Torgerson	-	-	0.17		GWAS
										N	Euro	Ferreira (2)	0.95	0.88-1.04	0.27		GWAS
	AS	11	15	RORA	rs11071559	T	C/T	C	DER	Y	DiscEuro	Moffatt (2)	0.85	0.79-0.90	1e-07	N	GWAS
										N	Easia	Hirota	0.85	0.77-0.95	0.004		GWAS
										N	Euro	Torgerson	-	-	0.002		GWAS
										N	Africa	Torgerson	-	-	0.08		GWAS
										N	Euro	Ferreira (2)	0.85	0.75-0.96	0.01		GWAS
	AS	12	4q31	USP38-GAB1	rs7686660	T	G/T	G	DER	N	DiscEasia	Hirota	1.15	1.10-1.20	2e-12	N	GWAS
	AS	13	5q22	TSLP-WDR36	rs1837253	C	C/T	T	DER	N	DiscEasia	Hirota	1.17	1.12-1.22	1e-16	N	GWAS
										N	Euro	Torgerson	0.81	-	1e-05	Shift	GWAS
										N	Africa	Torgerson	0.83	-	0.0023		GWAS
	AS	14	10p14	-	rs10508372	C	C/T	T	DER	N	DiscEasia	Hirota	1.15	1.11-1.20	2e-15	N	GWAS
	AS	15	12q13	Several	rs1701704	G	G/T	T	DER	N	DiscEasia	Hirota	1.16	1.11-1.22	2e-13	N	GWAS
	AS	16	8q24	SLC30A8	rs3019885	G	G/T	T	DER	Y	DiscEasia	Noguchi	1.34	1.24-1.45	5e-13	N	Comb
	AS	17	1q21.3	IL6R	rs4129267	T	C/T	C	DER	N	DiscEuro	Ferreira (2)	1.09	1.03-1.15	2e-08	N	Rep
	AS	18	11q13.5	LRRC32	rs7130588	G	A/G	A	DER	N	DiscEuro	Ferreira (2)	1.07	1.01-1.13	2e-08	N	Rep
	ATD	1	11q13.5	C11orf30	rs7927894	T	C/T	C	DER	N	DiscEuro	Esparza-Gordillo	1.24	1.15-1.33	7.64e-10	N	Rep
										N	Euro	Paternoster	1.07	1.02-1.12	0.008		GWAS
	ATD	2	1q21.3	FLG	rs3126085	A	A/G	A	ANC	N	DiscEasia	Sun	0.8	-	5.9e-12	N	Rep
	ATD	3	5q22.1	TMEM232/SLC25A46	rs7701890	G	A/G	G	ANC	N	DiscEasia	Sun	1.21	-	3.15e-09	N	Rep
	ATD	4	10q21.2	ZNF365	rs2393903	G	A/G	G	DER	N	DiscEasia	Sun	1.1	-	1.05e-07	N	Rep
	ATD	5	20q13.33	TNFRSF6B/ZGPAT	rs6010620	G	A/G	G	ANC	N	DiscEasia	Sun	1.14	-	3e-08	N	Rep
										N	Euro	Paternoster	1.09	1.03-1.15	0.002	Shift	GWAS
	ATD	6	11	OVOL1	rs479844	T	C/T	C	DER	N	DiscEuro	Paternoster	0.87	0.83-0.92	1.1e-13	N	Rep
	ATD	7	19	ACTL9	rs2164983	A	A/C	C	DER	N	DiscEuro	Paternoster	1.11	1.04-1.19	7.1e-09	N	Rep
	ATD	8	5	KIF3A	rs2897442	G	A/G	A	DER	N	DiscEuro	Paternoster	1.09	1.04-1.15	3.8e-08	N	Rep
	BP	1	10p21	ANK3	rs10994336	T	C/T	C	DER	Y	DiscEuro	Ferreira	1.45	-	9e-09	N	GWAS
										N	Euro	Scott	1.39	-	0.012		GWAS
										N	Euro	Cichon	1.22	-	0.13		GWAS
										N	Easia	Lee	1.08	-	0.002		Comb
										Y	Euro	Sklar (2)	1.35	1.23-1.48	7e-09		GWAS
					rs4948418	T	C/T	T	ANC	Y	DiscEuro	Chen	-	-	2e-08	N	GWAS
	BP	2	7	SP8	rs2709736	G	A/G	A	DER	Y	DiscEasia	Lee	0.8	0.72-0.88	5e-07	Y	Comb
										N	Euro	Chen	-	-	0.0007		GWAS
	BP	3	19p13.11	NCAN	rs1064395	A	A/G	G	DER	N	DiscEuro	Cichon	1.23	-	3e-08	N	Rep
										N	Euro	Chen	-	-	0.0003		GWAS
	BP	4	7p22.3	MAD1L1	rs11764590	T	C/T	C	DER	N	DiscEuro	Cichon	1.18	-	1e-07	N	Rep
										N	Euro	Chen	-	-	0.001		GWAS
	BP	5	12	CACNA1C	rs4765913	A	A/T	T	DER	N	DiscEuro	Sklar (2)	1.14	-	2e-08	N	Rep
	BP	6	11q14	ODZ4	rs12576775	G	A/G	A	DER	N	DiscEuro	Sklar (2)	1.14	-	4e-08	N	Rep
										Y	Euro	Chen	1.35	1.23-1.48	7e-09		GWAS
	BP	7	1p31.1	PTGFR-IFI44L	rs4650608	T	C/T	T	ANC	Y	DiscEuro	Chen	0.93	-	2e-08	N	GWAS
										N	Easia	Chen	0.8	-	0.2		GWAS
	BP	8	2q11.2	LMAN2L	rs2271893	G	A/G	G	ANC	Y	DiscEuro	Chen	0.87	-	1e-09	N	GWAS
										N	Easia	Chen	0.98	-	0.8		GWAS
	BP	9	3p21	-	rs7618915	G	A/G	G	ANC	Y	DiscEuro	Chen	0.98	-	2e-08	N	GWAS
	BP	10	3p22.2	TRANK1 (LBA1)	rs9834970	C	C/T	T	DER	Y	DiscEuro	Chen	0.81	-	1e-08	N	GWAS
										N	Easia	Chen	0.85	-	0.013		GWAS
	BC	1	2q35	-	rs13387042	A	A/G	G	DER	N	DiscEuro	Stacey	1.21	1.12-1.29	1e-13	N	Rep
										Y	Euro	Thomas	0.84	0.77-0.92	2e-08	Shift	Comb
										N	Euro	Li	0.85	0.79-0.91	9e-06	Shift	Comb
	BC	2	16q12.1	TNRC9, TOX3	rs3803662	T	C/T	C	DER	N	DiscEuro	Stacey	1.33	1.23-1.43	6e-19	N	Rep
										Y	Euro	Easton	1.2	1.16-1.24	1e-36		Comb
										Y	Euro	Thomas	1.16	1.07-1.27	1e-09		Comb
										Y	Euro	Li	1.22	1.13-1.32	4e-07		Comb
										N	Easia	Zheng	0.94	0.75-1.19	0.012	Shift	GWAS
										N	Easia	Long	0.89	0.84-0.94	0.0002	Shift	GWAS
					rs8051542	T	C/T	C	DER	N	DiscEuro	Easton	1.11	1.08-1.14	2e-19	N	Rep
										N	Easia	Zheng	1.04	0.89-1.23	0.1		GWAS
										N	Easia	Long	1.13	1.05-1.21	0.002		GWAS
					rs4784227	T	C/T	C	DER	N	DiscEasia	Long	1.23	1.16-1.31	3e-25	N	Rep
	BC	3	10q26.13	FGFR2	rs1219648	A	A/G	A	ANC	N	DiscEuro	Hunter	1.27	1.18-1.36	1e-10	N	Comb
										Y	Euro	Li	1.32	1.22-1.42	2e-13		Comb
										N	Easia	Zheng	1.2	1.01-1.42	0.003		GWAS
					rs2981582	T	C/T	C	DER	Y	DiscEuro	Easton	1.26	1.23-1.30	2e-76	N	Rep
										N	Easia	Zheng	1.14	0.97-1.34	0.001		GWAS
					rs2981579	T	C/T	C	DER	N	DiscEuro	Thomas	1.17	1.07-1.27	2e-10	N	Comb
	BC	4	5q11.2	MAP3K1	rs889312	C	A/C	A	DER	Y	DiscEuro	Easton	1.13	1.10-1.16	7e-20	N	Rep
					rs16886165	G	G/T	G	ANC	N	DiscEuro	Thomas	1.23	1.12-1.35	5e-07	N	Comb
	BC	5	11p15.5	LSP1	rs3817198	C	C/T	T	DER	N	DiscEuro	Easton	1.07	1.04-1.11	3e-09	N	Rep
										N	Euro	Thomas	1.04	0.96-1.08	0.07		Comb
										N	Easia	Zheng	1	0.84-1.19	0.75		GWAS
	BC	6	8q24.21	-	rs13281615	G	A/G	A	DER	N	DiscEuro	Easton	1.08	1.05-1.11	5e-12	N	Rep
	BC	7	6q25.1	ESR1	rs2046210	A	C/T	T	ANC	N	DiscEasia	Zheng	1.29	1.21-1.37	2e-15	N	Rep
	BC	8	1p11.2	-	rs11249433	C	C/T	T	DER	N	DiscEuro	Thomas	1.16	1.09-1.24	7e-10	N	Comb
										N	Euro	Li	1.18	1.10-1.27	1e-05		Comb
	BC	9	14q24.1	RAD51L1	rs999737	C	C/T	C	ANC	N	DiscEuro	Thomas	0.94	0.88-0.99	2e-07	N	Comb
										N	Euro	Li	0.89	0.81-0.97	0.008		Comb
	IS	1	4q25	PITX2	rs2200733	T	C/T	C	DER	N	DiscEuro	Gretarsdottir	1.34	1.13-1.59	2e-10	N	Rep
										N	Euro	Ikram	1	0.88-1.15	0.95		GWAS
	IS	2	12p13	NINJ2	rs12425791	A	A/G	G	DER	Y	DiscEuro	Ikram	1.39	1.25-1.55	2e-09	N	GWAS
	CrA	1	2q33.1	BOLL-PLCL1	rs1429412	G	A/G	A	DER	Y	DiscEuro	Bilguvar	1.26	1.15-1.37	3e-07	N	GWAS
	CrA	2	8q11.1	SOX17	rs9298506	A	A/G	A	ANC	Y	DiscEuro	Bilguvar	0.71	0.63-0.79	9e-10	Y	GWAS
										N	Euro	Yasuno	0.75	0.69-0.82	1e-10		GWAS
										N	Easia	Yasuno	0.83	0.74-0.93	0.001		Rep
	CrA	3	9p21.3	CDKN2A/B	rs1333040	T	C/T	C	DER	Y	DiscEuro	Bilguvar	0.78	0.71-0.85	2e-08	Y	GWAS
										Y	Euro	Yasuno	0.76	0.71-0.81	3e-16		GWAS
										N	Easia	Yasuno	0.76	0.69-0.84	1e-07		Rep
										N	Easia	Akiyama	0.78	0.58-1.02	>0.05		GWAS
	CrA	4	18q11.2	RBBP8	rs11661542	C	A/C	C	ANC	Y	DiscEuro	Yasuno	0.83	0.77-0.88	6e-09	Y	GWAS
										N	Easia	Yasuno	0.82	0.75-0.90	5e-05		Rep
	CAD	1	9p21	CDKN2A/B	rs10757274	G	A/G	A	DER	N	DiscEuro	McPherson	1.17	-	5e-08	N	Rep
					rs1333049	C	C/G	C	ANC	Y	DiscEuro	WTCCC	1.47	1.27-1.70	2e-14	N	GWAS
										-	Euro	Reilly	1.32	1.25-1.40	2e-25		Comb
										N	Easia	Wang	1.6	1.13-2.26	0.009		GWAS
										N	Easia	Takeuchi	1.28	1.15-1.43	4e-05		GWAS
					rs4977574	G	A/G	A	DER	Y	DiscEuro	Reilly	0.77	0.72-0.82	5e-14	Y	GWAS
										Y	Euro	C4DGC	0.79	0.74-0.84	5e-08		GWAS
										Y	Euro	Schunkert	1.29	1.23-1.36	1e-22	Shift	GWAS
										N	Easia	Takeuchi	1.24	1.13-1.37	1e-05	Shift	GWAS
										N	Africa	Lettre	1.18	0.93-1.49	0.17	Shift	GWAS
	CAD	2	1p13	SORT1	rs646776	T	C/T	T	ANC	Y	DiscEuro	Reilly	0.75	0.69-0.82	8e-11	Y	GWAS
										Y	Euro	C4DGC	0.76	0.70-0.82	5e-08		GWAS
										N	Easia	Takeuchi	0.82	0.68-0.99	0.044		GWAS
										N	Africa	Lettre	0.87	0.80-0.95	0.18		GWAS
					rs599839	A	A/G	G	DER	Y	DiscEuro	Schunkert	0.9	0.87-0.93	3e-10	Y	GWAS
										N	Africa	Lettre	1	0.88-1.11	0.97		GWAS
	CAD	3	15q25.1	ADAMTS7	rs1994016	C	C/T	C	ANC	Y	DiscEuro	Reilly	0.84	0.81-0.89	5e-13	Y	Comb
	CAD	4	6p24.1	C6orf105	rs6903956	A	A/G	A	ANC	N	DiscEasia	Wang	1.65	1.44-1.90	3e-13	N	Rep
	CAD	5	6p24.1	PHACTR1	rs9349379	-	-	-	-	Y	DiscEuro	C4DGC	-	-	4e-18	N	Comb
					rs12526453	C	C/G	C	ANC	Y	DiscEuro	Schunkert	0.91	0.88-0.94	1e-09	Y	GWAS
										N	Easia	Takeuchi	1.41	0.97-2.04	0.07		GWAS
										N	Africa	Lettre	0.76	0.68-0.87	0.06		GWAS
	CAD	6	10q23	LIPA	rs1412444	T	C/T	C	DER	N	DiscEuro	C4DGC	1.1	1.07-1.14	2e-10	N	Comb
										N	Easia	Takeuchi	1.01	0.89-1.14	0.93		GWAS
	CAD	7	1q41	MIA3	rs17465637	C	A/C	C	ANC	Y	DiscEuro	Schunkert	0.88	0.83-0.92	1e-08	Y	GWAS
										N	Easia	Takeuchi	0.93	0.79-1.04	0.21		GWAS
	CAD	8	2q33.1	WDR12	rs6725887	C	C/T	C	ANC	Y	DiscEuro	Schunkert	1.14	1.09-1.19	1e-09	N	GWAS
										N	Easia	Takeuchi	1.08	0.61-1.90	0.79		GWAS
										N	Africa	Lettre	0.88	0.60-1.16	0.64		GWAS
	CAD	9	3q22.1	MRAS	rs2306374	C	C/T	T	DER	Y	DiscEuro	Schunkert	1.12	1.07-1.16	3e-08	N	GWAS
	CAD	10	6q25.3	LPA	rs3798220	C	C/T	T	DER	Y	DiscEuro	Schunkert	1.51	1.33-1.70	3e-11	N	GWAS
										N	Easia	Takeuchi	0.99	0.82-1.19	0.89		GWAS
	CAD	11	10q11.2	CXCL12	rs1746048	C	C/T	T	DER	Y	DiscEuro	Schunkert	0.92	0.89-0.94	3e-10	Y	GWAS
										N	Easia	Takeuchi	0.97	0.88-1.09	0.63		GWAS
										N	Africa	Lettre	1.01	0.92-1.13	0.95		GWAS
	CAD	12	19p13.2	LDLR	rs1122608	G	G/T	G	ANC	Y	DiscEuro	Schunkert	0.88	0.85-0.92	1e-09	Y	GWAS
										N	Easia	Takeuchi	0.96	0.81-1.14	0.66		GWAS
										N	Africa	Lettre	1.05	0.78-1.32	0.85		GWAS
	CAD	13	21q22.1	MRPS6	rs9982601	T	C/T	C	DER	Y	DiscEuro	Schunkert	1.18	1.12-1.24	4e-10	N	GWAS
	CAD	14	1p32.2	PPAP2B	rs17114036	A	A/G	G	DER	Y	DiscEuro	Schunkert	0.85	0.82-0.88	4e-19	Y	Comb
										N	Easia	Takeuchi	0.9	0.64-1.25	0.55		GWAS
	CAD	15	6p21.31	ANKS1A	rs17609940	G	C/G	G	ANC	N	DiscEuro	Schunkert	0.93	0.91-0.95	1e-08	Y	Comb
										N	Easia	Takeuchi	0.98	0.67-1.45	0.93		GWAS
	CAD	16	6q23.2	TCF21	rs12190287	C	C/G	C	ANC	Y	DiscEuro	Schunkert	0.93	0.91-0.94	1e-12	Y	Comb
										N	Easia	Takeuchi	0.93	0.83-1.04	0.21		GWAS
	CAD	17	7q32.2	ZC3HC1	rs11556924	C	C/T	C	ANC	Y	DiscEuro	Schunkert	0.92	0.89-0.93	9e-18	Y	Comb
										N	Easia	Takeuchi	0.86	0.60-1.25	0.42		GWAS
	CAD	18	9q34.2	ABO	rs579459	C	C/T	C	ANC	N	DiscEuro	Schunkert	1.1	1.07-1.13	4e-14	N	Comb
										N	Easia	Takeuchi	1.03	0.91-1.16	0.64		GWAS
	CAD	19	10q24.32	CNNM2, NT5C2	rs12413409	G	A/G	G	ANC	N	DiscEuro	Schunkert	0.89	0.86-0.93	1e-09	Y	Comb
	CAD	20	11q23.3	ZNF259, APOA5	rs964184	G	C/G	C	DER	Y	DiscEuro	Schunkert	1.13	1.10-1.16	1e-17	N	Comb
										N	Easia	Takeuchi	1.02	0.90-1.16	0.73		GWAS
	CAD	21	13q34	COL4A1, COL4A2	rs4773144	G	A/G	G	ANC	N	DiscEuro	Schunkert	1.07	1.05-1.09	4e-09	N	Comb
	CAD	22	14q32.2	HHIPL1	rs2895811	C	C/T	T	DER	N	DiscEuro	Schunkert	1.07	1.05-1.10	1e-10	N	Comb
										N	Easia	Takeuchi	1.17	1.05-1.31	0.005		GWAS
	CAD	23	15q25.1	ADAMTS7	rs3825807	A	A/G	G	DER	N	DiscEuro	Schunkert	0.93	0.91-0.94	1e-12	Y	Comb
	CAD	24	17p13.3	SMG6, SRR	rs216172	C	C/G	G	DER	N	DiscEuro	Schunkert	1.07	1.05-1.09	1e-09	N	Comb
										N	Easia	Takeuchi	1.14	1.01-1.30	0.042		GWAS
	CAD	25	17p11.2	RASD1, SMCR3, PEMT	rs12936587	C	C/T	T	DER	N	DiscEuro	Schunkert	0.93	0.92-0.95	4e-10	Y	Comb
										N	Easia	Takeuchi	1.03	0.88-1.22	0.71	Shift	GWAS
	CAD	26	17q21.32	Several	rs46522	T	C/T	C	DER	N	DiscEuro	Schunkert	0.94	0.93-0.96	2e-08	Y	Comb
										N	Easia	Takeuchi	1.01	0.89-1.15	0.85		GWAS
	CAD	27	12q24	BRAP-ALDH2	rs671	A	A/G	G	DER	Y	DiscEasia	Takeuchi	1.4	1.31-1.49	2e-34	N	Rep
	HT	1	16q23.1	CDH13	rs11646213	T	A/T	A	DER	N	DiscEuro	Org	0.78	0.70-0.87	5e-08	N	Comb
										Y	Africa	Lettre	1.06	0.98-1.14	0.36	Shift	GWAS
	HT	2	12q21.33	ATP2B1	rs2681472	A	C/T	T	ANC	Y	DiscEuro	Levy	0.15(β)	±0.03	2e-11	N	Comb
										Y	Africa	Lettre	0.97	0.91-1.03	0.49	Shift	GWAS
	HT	3	16	UMOD	rs13333226	A	A/G	G	DER	N	DiscEuro	Padmanabhan	0.86	0.83-0.90	2e-10	N	Comb
	UC	1	1q32.1	IL10	rs3024505	T	C/T	C	ANC	N	DiscEuro	Franke	1.46	1.31-1.62	1e-12	N	Rep
										N	Euro	Silverberg	1.22	-	0.009		GWAS
										Y	Euro	Barrett	-	-	8e-08		GWAS
										Y	Euro	McGovern	1.23	-	1e-08		Rep
										N	Euro	Franke (2)	1.35	1.18-1.56	3e-05		GWAS
										Y	Euro	Anderson	1.25	1.19-1.32	6e-17		GWAS
	UC	2	2q35	ARPC2	rs12612347	T	C/T	T	ANC	N	DiscEuro	Franke	1.18	1.08-1.28	5e-08	N	Rep
										N	Euro	Silverberg	0.9	-	0.08		GWAS
										N	Easia	Asano	0.91	0.81-1.02	0.11		GWAS
										N	Euro	Barrett	-	-	0.024		GWAS
										N	Euro	Franke (2)	1.17	1.05-1.3	0.006		GWAS
	UC	3	1p31.2	IL23R	rs11805303	T	C/T	C	DER	N	DiscEuro	Franke	1.23	1.12-1.35	5e-08	N	Rep
										N	Euro	Silverberg	1.3	-	6e-05		GWAS
										N	Easia	Asano	0.93	0.83-1.11	0.3	Shift	GWAS
										N	Euro	Franke (2)	1.28	1.13-1.44	5e-05		GWAS
					rs11209026	G	A/G	G	ANC	Y	DiscEuro	Silverberg	0.57	-	1e-08	N	GWAS
										Y	Euro	Barrett	-	-	3e-10		GWAS
										Y	Euro	McGovern	0.65	-	6e-10		Rep
										N	Euro	Franke (2)	0.57	0.44-0.75	3e-05		GWAS
										Y	Euro	Anderson	0.57	0.52-0.64	5e-28		GWAS
					rs2201841	C	C/T	T	DER	Y	DiscEuro	McGovern	1.27	-	1e-13	N	Rep
	UC	4	1p36	OTUD3-PLA2G2E	rs6426833	A	A/G	G	DER	Y	DiscEuro	Silverberg	0.77	-	5e-13	N	Rep
										N	Easia	Asano	0.75	0.63-0.88	0.0007		GWAS
										Y	Euro	Barrett	-	-	2e-11		GWAS
										Y	Euro	McGovern	0.77	-	2e-21		Rep
										N	Euro	Franke (2)	0.77	0.69-0.86	4e-06		GWAS
										Y	Euro	Anderson	0.77	0.74-0.80	4e-35		GWAS
	UC	5	1p36	RNF186	rs3806308	G	A/G	A	DER	Y	DiscEuro	Silverberg	0.85	-	7e-09	N	Rep
										N	Easia	Asano	0.81	0.71-0.91	0.0004		GWAS
										Y	Euro	McGovern	0.7	-	3e-08		GWAS
	UC	6	12q15	IFNG-IL26-IL22	rs1558744	A	A/G	A	ANC	Y	DiscEuro	Silverberg	1.26	-	3e-12	N	Rep
										N	Easia	Asano	0.93	0.76-1.14	0.5		GWAS
										Y	Euro	McGovern	1.16	-	4e-12		Rep
										N	Euro	Franke (2)	1.12	1.00-1.25	0.047		GWAS
					rs971545	A	A/G	A	ANC	Y	DiscEuro	McGovern	0.86	-	2e-09	N	Rep
	UC	7	1q23.3	FCGR2A	rs1801274	T	C/T	T	ANC	N	DiscEasia	Asano	0.62	0.51-0.75	2e-12	N	Rep
										N	Euro	Franke (2)	0.84	0.76-0.94	0.003		GWAS
										Y	Euro	Anderson	1.21	1.16-1.26	2e-20	Shift	GWAS
					rs10800309	A	A/G	G	DER	N	DiscEuro	McGovern	1.2	-	3e-09	N	Rep
	UC	8	13q12	-	rs17085007	C	C/T	T	DER	N	DiscEasia	Asano	1.32	1.11-1.56	7e-08	N	Rep
										N	Euro	Franke (2)	1.24	1.08-1.41	0.002		GWAS
										Y	Euro	Anderson	1.16	1.10-1.21	1e-16		GWAS
	UC	9	7q22	SLC26A3-LAMB1	rs2108225	G	A/G	A	DER	N	DiscEasia	Asano	0.76	0.65-0.89	1e-07	N	Rep
										N	Euro	Franke (2)	0.9	0.81-1.01	0.07		GWAS
					rs886774	G	A/G	A	DER	N	DiscEuro	Barrett	1.11	1.03-1.19	3e-08	N	Comb
										N	Euro	Franke (2)	1.24	1.11-1.38	0.0002		GWAS
					rs4598195	C	A/C	A	DER	N	DiscEuro	McGovern	0.92	-	3e-09	N	Rep
	UC	10	16q22.1	CDH1	rs1728785	G	G/T	G	ANC	N	DiscEuro	Barrett	0.85	0.79-0.93	3e-08	Y	Comb
										N	Euro	McGovern	-	-	0.006		GWAS
										N	Euro	Franke (2)	0.86	0.75-0.98	0.026		GWAS
	UC	11	20q13.12	HNF4A	rs6017342	C	A/C	C	ANC	N	DiscEuro	Barrett	1.17	1.09-1.26	9e-17	N	Comb
										N	Euro	Franke (2)	0.89	0.79-0.99	0.034	Shift	GWAS
										Y	Euro	Anderson	1.2	1.15-1.26	1e-20		GWAS
	UC	12	1p36.12	-	rs7524102	A	A/G	G	DER	N	DiscEuro	Barrett	0.91	0.82-1.00	3e-07	Y	Comb
										N	Euro	McGovern	-	-	0.002		GWAS
										N	Euro	Franke (2)	0.86	0.73-1.01	0.06		GWAS
										Y	Euro	Anderson	0.82	0.78-0.87	1e-11		GWAS
	UC	13	13q13.3	-	rs9548988	T	C/T	T	ANC	N	DiscEuro	Barrett	1.1	1.03-1.21	3e-07	N	Comb
										N	Euro	McGovern	-	-	0.15		GWAS
										N	Euro	Franke (2)	0.96	0.86-1.07	0.43		GWAS
	UC	14	3p21.31	MST1	rs9858542	A	A/G	G	DER	N	DiscEuro	Barrett	-	-	7e-09	N	Comb
										Y	Euro	Anderson	1.21	1.16-1.26	2e-17		GWAS
					rs3197999	T	C/T	C	DER	N	DiscEuro	McGovern	1.2	-	4e-09	N	Rep
										N	Euro	Franke (2)	1.15	1.02-1.29	0.024		GWAS
	UC	15	10q24.2	NKX2-3	rs6584283	T	C/T	C	DER	N	DiscEuro	Barrett	-	-	2e-07	N	Comb
										N	Euro	Franke (2)	1.22	1.12-1.32	2e-06		GWAS
										Y	Euro	Anderson	1.21	1.16-1.26	8e-21		GWAS
					rs11190140	C	C/T	C	ANC	N	DiscEuro	McGovern	0.83	-	1e-08	N	Rep
										N	Euro	Franke (2)	0.81	0.73-0.91	0.0002		GWAS
	UC	16	2p16	REL, CCDC139, PUS10	rs13003464	G	A/G	G	ANC	Y	DiscEuro	McGovern	1.13	-	7e-09	N	Rep
										N	Euro	Franke (2)	1.19	1.06-1.33	0.002		GWAS
	UC	17	5p15	CEP72, TPPP	rs4957048	C	C/T	C	ANC	N	DiscEuro	McGovern	0.77	-	1e-09	N	Rep
	UC	18	9q34.2	CARD9	rs4077515	A	A/G	G	DER	N	DiscEuro	McGovern	1.14	-	6e-08	N	Rep
										Y	Euro	Anderson	1.16	1.11-1.21	1e-12		GWAS
	UC	19	17q12	ORMDL3	rs2305480	T	C/T	C	DER	N	DiscEuro	McGovern	1.15	-	3e-08	N	Rep
	UC	20	21q21.1	PSMG1	rs2836878	G	A/G	G	ANC	Y	DiscEuro	McGovern	0.79	-	1e-08	N	GWAS
										N	Euro	Franke (2)	0.83	0.74-0.94	0.004		GWAS
										Y	Euro	Anderson	0.8	0.76-0.83	2e-22		GWAS
	UC	21	7q22.1	SMURF1/KPNA7	rs7809799	G	A/G	A	DER	N	DiscEuro	Franke (2)	1.5	1.28-1.75	9e-11	N	Rep
	UC	22	22q13.33	IL17REL	rs5771069	G	A/G	G	ANC	N	DiscEuro	Franke (2)	1.15	1.08-1.24	4e-08	N	Rep
										Y	Euro	Anderson	1.11	1.07-1.16	2e-07		GWAS
	UC	23	2q37	GPR35	rs4676406	T	G/T	T	ANC	Y	DiscEuro	Anderson	0.88	0.85-0.91	8e-11	Y	Comb
	UC	24	1p36	TNFRSF14, MMEL1	rs734999	C	C/T	C	ANC	Y	DiscEuro	Anderson	0.95	0.92-0.99	3e-09	Y	Comb
	UC	25	1p36	TNFRSF9	rs35675666	G	G/T	G	ANC	Y	DiscEuro	Anderson	0.93	0.87-0.98	5e-09	Y	Comb
	UC	26	1p36	-	rs7524102	A	A/G	G	DER	Y	DiscEuro	Anderson	0.91	0.86-0.95	2e-13	Y	Comb
	UC	27	1q32	C1orf106	rs7554511	C	A/C	C	ANC	N	DiscEuro	Anderson	0.84	0.80-0.88	2e-13	Y	Comb
	UC	28	2q11	IL1R2	rs2310173	T	G/T	G	DER	Y	DiscEuro	Anderson	1.09	1.05-1.14	3e-12	N	Comb
	UC	29	5p15	DAP	rs267939	C	C/T	C	ANC	N	DiscEuro	Anderson	1.1	1.06-1.15	6e-12	N	Comb
	UC	30	5p13	IL7R	rs3194051	G	A/G	A	DER	N	DiscEuro	Anderson	1.07	1.02-1.12	4e-08	N	Comb
	UC	31	5p13	PTGER4	rs6451493	T	G/T	T	ANC	N	DiscEuro	Anderson	0.93	0.89-0.96	3e-09	Y	Comb
	UC	32	5q31	-	rs254560	A	A/G	G	DER	N	DiscEuro	Anderson	1.07	1.03-1.12	1e-09	N	Comb
	UC	33	5q33	IL12B	rs6871626	A	A/C	C	DER	Y	DiscEuro	Anderson	1.17	1.12-1.22	1e-21	N	Comb
	UC	34	6p21	-	rs943072	G	G/T	G	ANC	N	DiscEuro	Anderson	1.15	1.08-1.23	2e-10	N	Comb
	UC	35	6q21	PDRM1	rs6911490	T	C/T	C	DER	N	DiscEuro	Anderson	1.08	1.03-1.13	1e-08	N	Comb
	UC	36	6q23	-	rs6920220	A	A/G	G	DER	Y	DiscEuro	Anderson	1.14	1.09-1.20	8e-17	N	Comb
	UC	37	7p22	GNA12	rs798502	A	A/C	A	ANC	Y	DiscEuro	Anderson	0.88	0.85-0.93	3e-15	Y	Comb
	UC	38	7q32	IRF5, TNPO3	rs4728142	A	A/G	A	ANC	N	DiscEuro	Anderson	1.07	1.03-1.11	2e-08	N	Comb
	UC	39	9p24	JAK2	rs10758669	C	A/C	A	DER	Y	DiscEuro	Anderson	1.17	1.12-1.21	2e-25	N	Comb
	UC	40	9q32	TNFSF8, TNFSF15	rs4246905	C	C/T	C	ANC	Y	DiscEuro	Anderson	0.91	0.87-0.95	6e-12	Y	Comb
	UC	41	10p11	CCNY	rs12261843	G	G/T	T	DER	Y	DiscEuro	Anderson	1.07	1.03-1.12	7e-10	N	Comb
	UC	42	11q15	LSP1	rs907611	A	A/G	G	DER	Y	DiscEuro	Anderson	1.08	1.03-1.13	1e-10	N	Comb
	UC	43	11q13	-	rs2155219	T	G/T	T	ANC	N	DiscEuro	Anderson	0.88	0.85-0.93	5e-16	Y	Comb
	UC	44	11q23	-	rs678170	A	A/G	G	DER	Y	DiscEuro	Anderson	0.92	0.88-0.95	5e-14	Y	Comb
	UC	45	13q13	-	rs941823	C	C/T	T	DER	N	DiscEuro	Anderson	0.89	0.85-0.93	4e-12	Y	Comb
	UC	46	16q24	-	rs16940202	C	C/T	C	ANC	Y	DiscEuro	Anderson	1.15	1.10-1.21	6e-19	N	Comb
	UC	47	20q13	Several	rs2297441	A	A/G	G	DER	Y	DiscEuro	Anderson	0.92	0.87-0.96	2e-10	Y	Comb
	UC	48	21q21	-	rs1297265	A	A/G	G	DER	Y	DiscEuro	Anderson	0.9	0.87-0.94	7e-13	Y	Comb
	UC	49	21q22	ICOSLG	rs2838519	G	A/G	G	ANC	Y	DiscEuro	Anderson	1.14	1.05-1.22	6e-11	N	Comb
	ALL	1	10q11.22	ARID5B	rs10821936	C	C/T	T	DER	Y	DiscEuro	Treviño	1.91	1.60-2.20	1e-15	N	GWAS
										N	Easia	Han	3.21	1.44-7.07	0.004		GWAS
										Y	Euro	Ellinghaus	1.46	1.33-1.60	4.06e-15		Comb
					rs7089424	C	A/C	A	DER	Y	DiscEuro	Papaemmanuil	1.65	1.54-1.76	7e-19	N	GWAS
										Y	Euro	Ellinghaus	1.42	1.30-1.56	1.98e-12		GWAS
	ALL	2	7p12.2	IKZF1	rs11978267	C	C/T	C	ANC	Y	DiscEuro	Treviño	1.69	1.40-1.90	9e-11	N	GWAS
										Y	Euro	Ellinghaus	1.44	1.30-1.59	1.07e-12		Comb
					rs4132601	C	A/C	A	DER	Y	DiscEuro	Papaemmanuil	1.69	1.58-1.81	1e-19	N	GWAS
										Y	Euro	Ellinghaus	1.43	1.30-1.58	8.26e-12		Comb
	ALL	3	14q11.2	CEBPE	rs2239633	G	A/G	G	ANC	Y	DiscEuro	Papaemmanuil	0.75	0.69-0.82	3e-07	Y	GWAS
										Y	Euro	Ellinghaus	0.74	0.68-0.82	4e-10		Comb
	ALL	4	3	TP63	rs17505102	G	C/G	G	ANC	Y	DiscEuro	Ellinghaus	0.63	0.52-0.75	8.94e-09	Y	Rep
	ALL	5	11	OR8U8	rs1945213	G	C/G	C	DER	Y	DiscEuro	Ellinghaus	0.78	0.69-0.88	3.89e-08	Y	Rep
	LC	1	15q25.1	CHRNA3-5	rs8034191	C	C/T	T	DER	Y	DiscEuro	Hung	1.3	1.23-1.37	5e-20	N	Comb
										Y	Euro	Amos	1.3	1.15-1.47	2e-05		GWAS
										Y	Euro	McKay	1.34	1.25-1.44	3e-15		GWAS
										N	Euro	Wang	1.28	-	1e-06		GWAS
										N	Easia	Hsiung	1.14	0.90-1.46	0.28		Comb
										N	Easia	Miki	1.18	0.84-1.65	0.34		GWAS
					rs1051730	A	C/T	C	DER	N	DiscEuro	Amos	1.32	1.23-1.39	7e-18	N	Comb
										Y	Euro	McKay	1.35	1.25-1.45	1e-15		GWAS
										Y	Euro	Wang	1.3	-	4e-07		GWAS
										N	Easia	Hsiung	1.26	0.98-1.62	0.07		Comb
										N	Easia	Miki	1.2	0.85-1.69	0.29		GWAS
	LC	2	5p15.33	TERT, CLPTM1L	rs401681	C	C/T	T	DER	N	DiscEuro	Wang	0.92	0.88-0.96	8e-09	N	Rep
										N	Euro	McKay	0.84	0.78-0.90	2e-06		GWAS
										N	Easia	Miki	0.85	0.76-0.96	0.011		GWAS
										N	Easia	Yoon	0.77	0.67-0.89	0.0002		GWAS
										N	Easia	Hu	0.91	0.84-0.99	0.021		GWAS
					rs402710	C	C/T	C	ANC	Y	DiscEuro	McKay	1.15	1.07-1.24	1e-11	N	Rep
										N	Easia	Hsiung	1.12	1.04-1.22	0.005		Comb
										N	Easia	Yoon	1.28	1.11-1.47	0.0006		GWAS
					rs2736100	C	G/T	T	DER	N	DiscEuro	McKay	0.92	0.85-0.98	6e-08	N	Rep
										N	Euro	Amos	0.81	0.72-0.91	0.0005		GWAS
										N	Euro	Hung	0.85	0.78-0.93	0.0002		GWAS
										Y	Easia	Hsiung	1.44	1.29-1.60	5e-11	Shift	Rep
										Y	Easia	Miki	1.29	1.16-1.44	3e-11	Shift	GWAS
										N	Easia	Yoon	1.26	1.11-1.43	0.0003	Shift	GWAS
										Y	Easia	Hu	1.18	1.09-1.28	5e-05	Shift	GWAS
										N	Easia	Ahn	1.29	1.07-1.55	0.008	Shift	GWAS
	LC	3	3p28	TP63	rs10937405	C	C/T	T	DER	N	DiscEasia	Miki	0.74	0.67-0.82	7e-12	Y	Rep
										Y	Easia	Hu	0.85	0.78-0.93	0.0003		GWAS
					rs4488809	C	C/T	T	DER	Y	DiscEasia	Hu	1.26	1.21-1.32	7e-26	N	Comb
	LC	4	3q29	C3orf21	rs2131877	G	C/T	C	ANC	N	DiscEasia	Yoon	1.29	1.14-1.46	2e-08	N	Rep
	LC	5	13q12.12	TNFRSF19	rs753955	G	C/T	T	DER	N	DiscEasia	Hu	1.18	1.11-1.27	2e-12	N	Rep
	LC	6	22q12.2	LIF	rs36600	A	C/T	C	DER	N	DiscEasia	Hu	1.15	1.04–1.28	6e-13	N	Rep
	MI	1	9p21	CDKN2A/B	rs10757278	G	A/G	A	DER	N	DiscEuro	Helgadottir	1.31	1.22-1.40	1e-20	N	Rep
					rs4977574	G	A/G	G	DER	Y	DiscEuro	Kathiresan	0.81	0.76-0.85	3e-44	Y	Rep
	MI	2	1p13	CELSR2, PSRC1, SORT1	rs646776	T	C/T	T	ANC	N	DiscEuro	Kathiresan	0.85	0.78-0.93	8e-12	Y	Rep
	MI	3	1q41	MIA3	rs17465637	C	A/C	C	ANC	N	DiscEuro	Kathiresan	0.9	0.84-0.96	1e-09	Y	Rep
	MI	4	10q11	CXCL12	rs1746048	C	C/T	T	DER	N	DiscEuro	Kathiresan	0.91	0.83-1.00	7e-09	Y	Rep
	MI	5	21q22	SLC5A3, MPRS6, KCNE2	rs9982601	T	C/T	C	DER	N	DiscEuro	Kathiresan	1.34	1.22-1.47	6e-11	N	Rep
	MI	6	6p24	PHACTR1	rs12526453	C	C/G	C	ANC	N	DiscEuro	Kathiresan	0.89	0.83-0.95	1e-09	Y	Rep
	MI	7	2q33	WDR12	rs6725887	C	C/T	C	ANC	N	DiscEuro	Kathiresan	1.15	1.04-1.26	1e-08	N	Rep
	MI	8	19p13	LDLR	rs1122608	G	G/T	G	ANC	N	DiscEuro	Kathiresan	0.84	0.78-0.91	2e-09	Y	Rep
	MI	9	1p32	PCSK9	rs11206510	T	C/T	C	DER	N	DiscEuro	Kathiresan	0.86	0.79-0.93	1e-08	Y	Rep
	MI	10	5p15.3	-	rs11748327	C	C/T	C	ANC	N	DiscEasia	Aoki	0.83	0.76-0.91	5e-13	N	Rep
	MI	11	12q24	BRAP	rs3782886	C	A/G	A	DER	N	DiscEasia	Aoki	1.43	1.28-1.61	8e-10	N	Rep
	NL	1	22q13.33	CPT1B-CHKB	rs5770917	C	C/T	T	DER	N	DiscEasia	Migayawa	1.79	1.43-2.25	4e-07	N	Comb
										N	Euro	Hallmayer	0.84	0.61-1.16	0.3		GWAS
	NL	2	14q11.2	TRA@	rs1154155	C	A/C	A	DER	Y	DiscEuro	Hallmayer	1.8	1.36-2.39	2e-13	N	Rep
										N	Euro	Hor	1.54	1.23-1.92	0.0002		GWAS
	NHL	1	14q32	CDC42BPB	rs751837	C	C/T	C	ANC	N	DiscEasia	Kumar	3.51	2.13-5.88	3e-07	N	Comb
	PC	1	9q34	ABO	rs505922	C	C/T	T	DER	N	DiscEuro	Amundadottir	1.15	1.05-1.26	5e-08	N	Rep
										N	Easia	Low	1.11	1.01-1.22	0.037		GWAS
	PC	2	13q22.1	-	rs9543325	C	C/T	C	ANC	Y	DiscEuro	Petersen	1.26	1.18-1.35	3e-11	N	GWAS
										N	Easia	Low	1.21	1.10-1.34	0.0002		GWAS
										N	Easia	Wu	1.3	1.17-1.45	3e-06		GWAS
	PC	3	1q32.1	NR5A2	rs3790844	T	C/T	T	ANC	Y	DiscEuro	Petersen	0.77	0.71-0.84	2e-10	N	GWAS
										N	Easia	Low	1.14	1.03-1.27	0.012	Shift	GWAS
										N	Easia	Wu	1.14	1.01-1.27	0.028	Shift	GWAS
	PC	4	5p15.33	CLPTM1L-TERT	rs401681	T	C/T	T	ANC	Y	DiscEuro	Petersen	1.19	1.12-1.27	4e-07	N	GWAS
										N	Easia	Wu	1.24	1.10-1.39	0.0003		GWAS
	PC	5	6p25.3	FOXQ1	rs9502893	G	A/G	A	DER	Y	DiscEasia	Low	1.29	1.17-1.43	3e-07	N	GWAS
	PC	6	12p11	BICD	rs708224	A	A/G	A	ANC	Y	DiscEasia	Low	0.76	0.68-0.84	3e-07	Y	GWAS
	PC	7	21q21.3	BACH1	rs372883	T	C/T	T	ANC	Y	DiscEasia	Wu	0.83	0.77-0.89	2e-13	N	Rep
	PC	8	5p13.1	DAB2	rs2255280	T	G/T	T	ANC	Y	DiscEasia	Wu	0.85	0.78-0.92	4e-10	N	Rep
	PC	9	10q26	PRLHR	rs12413624	A	A/T	T	ANC	N	DiscEasia	Wu	1.19	1.10-1.28	5e-11	N	Rep
	PC	10	21q22.3	TFF1	rs1547374	A	A/G	G	DER	N	DiscEasia	Wu	0.81	0.75-0.88	4e-13	N	Rep
	PC	11	22q13.3	FAM19A5	rs5768709	G	A/G	G	ANC	N	DiscEasia	Wu	1.2	1.11-1.31	1e-10	N	Rep
	PD	1	4p16.3	DGKQ/GAK	chr4:911311	C	-	-	-	Y	DiscEuro	IPDGC	1.14	1.12-1.16	<5E-08	N	Rep
					rs6599389	A	A/G	G	DER	Y	DiscEuro	Bo (23andMe)	1.31	1.19-1.44	4e-08	N	GWAS
	PD	2	17q21	MAPT	rs393152	A	A/G	G	DER	Y	DiscEuro	Simon-Sanchez	0.78	-	2e-16	N	Rep
										N	Euro	Edwards	0.76	0.62-0.92	0.006		GWAS
										Y	Euro	Spencer	0.76	0.69-0.84	5e-08		GWAS
										N	Euro	Saad	0.76	-	3e-05		GWAS
										N	Euro	Simon-Sanchez (2)	0.76	-	0.009		GWAS
					rs2942168	G	A/G	G	ANC	Y	DiscEuro	IPDGC	0.8	0.77-0.83	<5E-08	N	Rep
					rs12185268	A	A/G	G	DER	Y	DiscEuro	Bo (23andMe)	0.77	0.72-0.82	3e-14	N	GWAS
	PD	3	4q22	SNCA	rs3857059	G	A/G	G	ANC	Y	DiscEuro	Simon-Sanchez	1.43	-	4e-15	N	Rep
										Y	Easia	Satake	0.67	0.60-0.75	1e-12	Shift	GWAS
										N	Euro	Saad	1.54	-	1e-05		GWAS
										N	Euro	Simon-Sanchez (2)	1.39	-	0.002		GWAS
					rs356220	T	C/T	T	ANC	Y	DiscEuro	Hamza	1.38	1.25-1.52	3e-11	N	GWAS
										Y	Euro	Spencer	1.27	1.17-1.37	5e-09		GWAS
										Y	Euro	Saad	1.37	-	3e-08		GWAS
										Y	Euro	Bo (23andMe)	1.29	1.22-1.36	2e-19		GWAS
					rs356219	G	A/G	A	DER	Y	DiscEuro	IPDGC	1.27	1.25-1.29	<5E-08	N	Rep
	PD	4	1q32	PARK16	rs947211	G	A/G	A	DER	N	DiscEasia	Satake	0.74	0.66-0.84	2e-12	Y	Rep
										N	Euro	Simon-Sanchez	0.88	-	0.01		GWAS
										N	Euro	Hamza	0.88	-	0.03		GWAS
										N	Euro	Saad	0.91	-	0.14		GWAS
										N	Euro	Simon-Sanchez (2)	0.89	-	0.12		GWAS
	PD	5	4p15	BST1	rs12645693	G	A/G	G	ANC	N	DiscEasia	Satake	1.25	1.11-1.41	9e-09	N	Rep
										N	Euro	Simon-Sanchez	0.95	-	0.63		GWAS
										N	Euro	Hamza	1.05	-	0.74		GWAS
										N	Euro	Simon-Sanchez (2)	1.06	-	0.76		GWAS
					rs11724635	A	A/C	A	ANC	Y	DiscEuro	IPDGC	0.87	0.85-0.89	<5E-08	N	Rep
	PD	6	12q12	LRRK2	rs1994090	G	G/T	T	DER	N	DiscEasia	Satake	1.26	1.04-1.54	3e-08	N	Rep
										N	Euro	Hamza	1.12	-	0.05		GWAS
										N	Euro	Bo (23andMe)	1.02	0.96-1.09	0.5		GWAS
					rs1491942	G	C/G	G	ANC	Y	DiscEuro	IPDGC	1.3	1.25-1.35	<5E-08	N	Rep
										N	Euro	Bo (23andMe)	1.17	1.08-1.26	0.0002		GWAS
					rs34637584	A	-	-	-	Y	DiscEuro	Bo (23andMe)	9.62	6.43-14.37	2e-28	N	GWAS
	PD	7	12q24	RF4	rs4964469	A	A/G	A	ANC	N	DiscEuro	Saad	1.12	1.05-1.19	2e-07	N	Rep
										N	Euro	Simon-Sanchez (2)	1.04	-	0.38		GWAS
	PD	8	1	SYT11	chr1:154105678	T	-	-	-	Y	DiscEuro	IPDGC	1.44	1.36-1.52	<5E-08	N	Rep
										N	Euro	Bo (23andMe)	1.17	1.07-1.27	0.0005		GWAS
	PD	9	2	ACMSD	rs6710823	A	A/G	G	DER	Y	DiscEuro	IPDGC	1.07	1.05-1.09	<5E-08	N	Rep
										N	Euro	Bo (23andMe)	1.04	0.98-1.11	0.19		GWAS
	PD	10	2	STK39	rs2102808	T	G/T	G	DER	Y	DiscEuro	IPDGC	1.12	1.08-1.16	<5E-08	N	Rep
										N	Euro	Bo (23andMe)	1.2	1.11-1.30	5e-06		GWAS
	PD	11	3	MCCC1/LAMP3	rs11711441	G	A/G	G	ANC	Y	DiscEuro	IPDGC	0.87	0.84-0.90	<5E-08	N	Rep
										N	Euro	Bo (23andMe)	0.82	0.76-0.89	1e-06		GWAS
					rs10513789	T	G/T	T	ANC	Y	DiscEuro	Bo (23andMe)	0.87	0.83-0.92	3e-10	N	Rep
	PD	12	12	CCDC62/HIP1R	rs12817488	A	A/G	G	DER	Y	DiscEuro	IPDGC	1.13	1.10-1.16	<5E-08	N	Rep
										N	Euro	Bo (23andMe)	0.92	0.86-0.98	0.007	Shift	GWAS
	PD	13	1	GBA	i4000416	C	-	-	-	Y	DiscEuro	Bo (23andMe)	4.05	3.08-5.32	5e-21	N	GWAS
	PD	14	4	SCARB2	rs6812193	C	C/T	C	ANC	Y	DiscEuro	Bo (23andMe)	0.9	0.86-0.94	8e-10	N	Rep
	PD	15	17	SREBF1/RAI1	rs11868035	G	A/G	G	ANC	Y	DiscEuro	Bo (23andMe)	0.95	0.91-0.99	5e-08	N	Rep
	PD	16	1	SLC41A1	rs823156	A	A/G	G	DER	Y	DiscEuro	Bo (23andMe)	0.83	0.77-0.89	1e-07	N	GWAS
	PD	17	18	RIT2/SYT4	rs4130047	C	C/T	C	ANC	Y	DiscEuro	Bo (23andMe)	1.08	1.03-1.13	2e-07	N	Rep
	PrC	1	8q24	-	rs1447295	A	A/C	C	DER	N	DiscEuro	Yeager	1.43	1.29-1.59	2e-14	N	Comb
										Y	Easia	Takata	1.61	-	6e-20		GWAS
										Y	Euro	Schumacher	1.49	1.34-1.66	2e-13		GWAS
					rs16901979	A	A/C	A	ANC	N	DiscEuro	Gudmundsson	1.79	1.53-2.11	1e-12	N	Rep
										N	Euro	Schumacher	1.43	1.18-1.72	0.0002		GWAS
	PrC	2	17q12	HFN1B/TCF2	rs4430796	A	A/G	G	DER	N	DiscEuro	Gudmundsson (2)	1.24	1.14-1.35	1e-11	N	Rep
										Y	Easia	Takata	1.3	-	1e-08		GWAS
										N	Africa	Haiman	1.02	0.95-1.11	0.52		GWAS
										N	Euro	Schumacher	0.84	0.78-0.90	2e-05	Shift	GWAS
	PrC	3	17q24.3	-	rs1859962	G	G/T	T	DER	N	DiscEuro	Gudmundsson (2)	1.25	1.15-1.35	3e-10	N	Rep
										N	Easia	Takata	0.99	-	0.84		GWAS
										N	Africa	Haiman	0.99	0.92-1.07	0.84		GWAS
										Y	Euro	Schumacher	1.27	1.18-1.37	3e-11		GWAS
	PrC	4	2p24	C2orf43	rs13385191	G	A/G	A	DER	N	DiscEasia	Takata	0.89	0.83-0.95	8e-08	Y	Rep
										N	Africa	Haiman	0.99	0.84-1.16	0.9	Shift	GWAS
	PrC	5	5p15	-	rs12653946	T	C/T	T	ANC	Y	DiscEasia	Takata	1.23	1.16-1.31	4e-18	N	Rep
										N	Africa	Haiman	1.05	0.98-1.13	0.15		GWAS
										N	Euro	Schumacher	1.12	1.05-1.20	0.001		GWAS
	PrC	6	6p21	FOXP4	rs1983891	T	C/T	C	DER	N	DiscEasia	Takata	1.11	1.04-1.18	8e-08	N	Rep
										N	Africa	Haiman	1.09	1.01-1.17	0.024		GWAS
	PrC	7	6q22	GPRC6A / RFX6	rs339331	T	C/T	T	ANC	Y	DiscEasia	Takata	0.85	0.79-0.90	2e-12	Y	Rep
										N	Africa	Haiman	0.82	0.76-0.89	3.1e-06		GWAS
										N	Euro	Schumacher	0.9	0.83-0.97	0.009		GWAS
	PrC	8	13q22	-	rs9600079	T	G/T	T	ANC	N	DiscEasia	Takata	1.17	1.10-1.25	3e-09	N	Rep
										N	Africa	Haiman	1.02	0.96-1.10	0.53	Shift	GWAS
										N	Euro	Schumacher	1.02	0.95-1.10	0.62		GWAS
	PrC	9	17q21	ZNF652	rs7210100	A	A/G	G	DER	N	DiscAfri	Haiman	1.51	1.35-1.69	3.4e-13	Y	Comb
	PrC	10	2q37	MLPH	rs2292884	G	A/G	G	ANC	N	DiscEuro	Schumacher	0.88	0.84-0.92	4e-08	Y	Comb
	PrC	11	12q13	KRT8	rs902774	A	A/G	G	DER	N	DiscEuro	Schumacher	1.17	1.11-1.24	5e-09	N	Comb
	PS	1	20q13	ZNF313-RNF114	rs495337	C	C/T	C	ANC	N	DiscEuro	Capon	0.8	0.70-0.91	1e-08	Y	Rep
										N	Euro	Nair	0.81	-	0.0002		GWAS
										N	Euro	Strange	0.83	0.77-0.90	2e-06		GWAS
										N	Euro	Stuart	0.85	-	0.0007		GWAS
	PS	2	1q21	LCE3D	rs4085613	C	A/C	A	DER	Y	DiscEasia	Zhang	0.8	0.76-0.84	7e-30	N	Rep
	PS	3	5q33	IL12B	rs3213094	A	G/T	G	DER	N	DiscEasia	Zhang	0.79	0.75-0.83	3e-26	N	Rep
										Y	Euro	Strange	1.39	1.26-1.53	5e-11	Shift	GWAS
					rs2082412	G	A/G	G	ANC	Y	DiscEuro	Nair	0.69	-	2e-28	Y	Rep
					rs2546890	A	A/G	A	ANC	N	DiscEuro	Elinghaus	0.65	0.56-0.76	1e-20	N	GWAS
	PS	4	5	TNIP1	rs17728338	A	A/G	G	DER	N	DiscEuro	Nair	1.59	-	1e-20	N	Rep
										Y	Easia	Zhang/Sun	1.5	1.34-1.68	9e-13		GWAS
	PS	5	5q31	IL13	rs20541	G	A/G	G	ANC	N	DiscEuro	Nair	0.79	-	5e-15	Y	Rep
										N	Easia	Zhang/Sun	0.93	0.87-0.99	0.034		GWAS
										N	Euro	Strange	0.89	0.81-0.98	0.023		GWAS
	PS	6	6	TNFAIP3	rs610604	G	G/T	G	ANC	N	DiscEuro	Nair	1.19	-	9e-12	N	Rep
										N	Easia	Zhang/Sun	1.16	1.05-1.29	0.004		GWAS
										N	Euro	Strange	1.22	1.13-1.32	7e-07		GWAS
	PS	7	12	IL23A-STAT2	rs2066808	A	A/G	G	DER	N	DiscEuro	Nair	0.75	-	1e-09	Y	Rep
										N	Easia	Zhang/Sun	0.86	0.72-1.02	0.08		GWAS
										Y	Euro	Strange	0.67	0.59-0.78	2e-07		GWAS
	PS	8	1p31	IL23R	rs2201841	G	A/G	A	DER	N	DiscEuro	Nair	1.13	-	3e-08	N	Rep
										N	Easia	Zhang/Sun	0.93	0.87-1.00	0.06	Shift	GWAS
	PS	9	6	TRAF3IP2	rs13210247	G	A/G	A	DER	N	DiscEuro	Elinghaus	1.7	1.30-2.22	7e-09	N	GWAS
					rs240993	A	A/G	G	DER	Y	DiscEuro	Strange	1.25	1.16-1.40	5e-20	N	GWAS
	PS	10	2p16	REL	rs702873	G	A/G	A	DER	N	DiscEuro	Strange	0.89	0.83-0.96	4e-09	Y	GWAS
	PS	11	2q24	IFIH1	rs17716942	A	A/G	A	ANC	Y	DiscEuro	Strange	0.77	0.70-0.85	1e-13	Y	GWAS
	PS	12	5q15	ERAP1	rs27524	A	A/G	A	ANC	Y	DiscEuro	Strange	1.13	1.05-1.22	3e-11	N	GWAS
	PS	13	14q13	NFKBIA	rs8016947	C	A/C	C	ANC	N	DiscEuro	Strange	1.19	1.11-1.27	2e-11	N	GWAS
	PS	14	19p13	TYK2	rs12720356	A	A/C	A	ANC	N	DiscEuro	Strange	0.71	0.62-0.81	4e-11	Y	GWAS
	PS	15	17	NOS2	rs4795067	G	A/G	A	DER	N	DiscEuro	Stuart	1.19	-	4e-11	N	GWAS
	PS	16	16	FBXL19	rs10782001	G	A/G	G	ANC	N	DiscEuro	Stuart	1.16	-	9e-10	N	GWAS
	PS	17	14	NFKBIA, PSMA6	rs12586317	T	C/T	T	ANC	N	DiscEuro	Stuart	0.87	-	1e-09	Y	GWAS
	SZ	1	2q32.1	ZNF804A	rs1344706	T	G/T	T	ANC	N	DiscEuro	O'Donovan	0.92	-	2e-07	Y	Rep
										-	Euro	Shi	0.92	-	0.038		GWAS
										-	Euro	Purcell	0.93	-	0.029		GWAS
										-	Easia	Ikeda	0.91	-	0.1		GWAS
	SZ	2	11q24.2	NRGN	rs12807809	T	C/T	C	DER	N	DiscEuro	3 GWAS	0.87	0.83-0.91	2e-09	Y	Comb
	SZ	3	18q21.2	TCF4-CCDC68	rs9960767	C	A/C	A	DER	N	DiscEuro	3 GWAS	1.23	1.15-1.32	4e-09	N	Comb
					rs12966547	C	C/T	T	DER	N	DiscEuro	Ripke	0.93	0.89-0.96	6e-09	Y	Rep
	SZ	4	11p11.2	AMBRA1-DGKZ	rs11819869	T	C/T	T	ANC	N	DiscEuro	Rietschel	1.2	-	4e-09	N	Rep
	SZ	5	1p21.3	miR-137	rs1625579	T	G/T	G	DER	N	DiscEuro	Ripke	0.9	0.86-0.93	7e-10	Y	Rep
	SZ	6	10q24.3	CNNM2	rs7914558	G	A/G	A	DER	N	DiscEuro	Ripke	0.93	0.89-0.97	3e-08	Y	Rep
	SZ	7	11p11.2	TSPAN18	rs11038167	A	A/C	A	ANC	Y	DiscEasia	Yue	1.29	1.23-1.36	1e-11	N	Comb
	SZ	8	8p12	LSM1-WHSC1L1	rs16887244	A	A/G	A	ANC	N	DiscEasia	Shi	0.83	0.78-0.89	1e-10	N	Rep
	SZ	9	1q24.2	BRP44-DCAF6	rs10489202	A	A/C	C	DER	N	DiscEasia	Shi	1.19	1.09-1.29	1e-08	N	Rep
	SSc	1	7q32	TNPO3-IRF5	rs10488631	C	C/T	T	DER	Y	DiscEuro	Radstake	1.5	1.35–1.67	2e-13	N	GWAS
										N	Euro	Allanore	1.39	1.12-1.72	0.003		GWAS
										Y	Euro	Gorlova	1.5	1.32-1.69	2e-10		GWAS
	SSc	2	2q32	STAT4	rs3821236	A	A/G	G	DER	Y	DiscEuro	Radstake	1.5	1.19–1.41	3e-09	N	GWAS
										N	Euro	Allanore	1.16	0.98-1.36	0.09		GWAS
										Y	Euro	Gorlova	1.31	1.19-1.48	9e-08		GWAS
	SSc	3	1q22-23	CD247	rs2056626	T	G/T	G	DER	Y	DiscEuro	Radstake	0.89	0.83-0.96	3e-09	N	Rep
										N	Euro	Allanore	0.84	0.73-0.97	0.017		GWAS
										N	Euro	Gorlova	0.81	0.75-0.89	3e-06		GWAS
	SSc	4	5q33	TNIP1	rs2233287	A	A/G	G	DER	N	DiscEuro	Allanore	1.26	1.13-1.40	5e-09	N	Rep
	SSc	5	16q24.1	IRF8	rs11642873	A	A/C	A	ANC	Y	DiscEuro	Gorlova	0.78	0.70-0.87	2e-12	N	Rep
	SLE	1	2q32.2	STAT4	rs7574865	T	G/T	T	ANC	Y	DiscEuro	Hom	-	-	9e-14	N	GWAS
										Y	Euro	Harley	1.5	1.24-1.82	3e-09		GWAS
										Y	Easia	Han	1.51	1.43-1.61	5e-42		GWAS
										Y	Easia	Yang	1.68	-	4e-09		GWAS
					rs3821236	A	A/G	G	DER	N	DiscEuro	Graham	1.49	-	8e-11	N	GWAS
										N	Easia	Han	1.27	1.11-1.47	0.0007		GWAS
	SLE	2	7q32.1	IRF5, TNPO3	rs10488631	C	C/T	T	DER	Y	DiscEuro	Hom	-	-	2e-11	N	GWAS
										N	Easia	Han	9.01	0.83-97.7	0.07		GWAS
					rs12537284	A	A/G	G	DER	Y	DiscEuro	Harley	1.54	1.40-1.70	4e-19	N	GWAS
										N	Easia	Han	3.4	0.59-19.6	0.17		GWAS
	SLE	3	8p23.1	BLK, C8orf13	rs13277113	A	A/G	G	DER	Y	DiscEuro	Hom	1.23	1.13-1.55	1e-10	N	Rep
										Y	Easia	Han	0.66	0.56-0.78	3e-07	Shift	GWAS
					rs7836059	G	A/G	G	ANC	Y	DiscEuro	Harley	0.82	0.78-0.88	4e-10	N	GWAS
										N	Easia	Han	1.13	0.87-1.46	0.37		GWAS
					rs2618476	C	C/T	T	DER	N	DiscEuro	Graham	1.28	-	2e-08	N	GWAS
					rs7812879	G	C/T	C	ANC	Y	DiscEasia	Han	0.69	0.64-0.74	2e-24	N	Comb
	SLE	4	16p11.22	ITGAM, ITGAX	rs11574637	C	C/T	T	DER	N	DiscEuro	Hom	1.59	1.33-1.91	3e-11	N	Rep
										N	Easia	Han	1.97	0.64-6.01	0.24		GWAS
					rs9888739	T	C/T	T	ANC	Y	DiscEuro	Harley	1.62	1.47-1.78	2e-23	N	GWAS
										N	Easia	Han	2.38	0.77-7.36	0.13		GWAS
	SLE	5	11p15.5	KIAA1542	rs4963128	G	A/G	A	DER	Y	DiscEuro	Harley	0.78	0.73-0.85	3e-10	N	GWAS
										N	Easia	Han	0.9	0.67-1.22	0.51		GWAS
	SLE	6	3p14.3	PXK	rs6445975	C	G/T	T	DER	Y	DiscEuro	Harley	1.25	1.16-1.35	7e-09	N	GWAS
										N	Easia	Han	1.01	0.86-1.20	0.88		GWAS
	SLE	7	1q25.1	-	rs10798269	G	A/G	A	DER	Y	DiscEuro	Harley	0.82	0.76-0.88	1e-07	N	GWAS
										N	Easia	Han	0.81	0.70-0.94	0.007		GWAS
	SLE	8	1q25.3	NMNAT2	rs2022013	A	A/G	A	ANC	Y	DiscEuro	Harley	0.85	0.79-0.90	1e-07	N	GWAS
										N	Easia	Han	1.23	1.07-1.42	0.004		GWAS
	SLE	9	5q33.3	-	rs2431697	T	C/T	C	DER	Y	DiscEuro	Harley	0.82	0.77-0.87	1e-10	N	GWAS
										N	Easia	Han	0.7	0.58-0.84	0.0002		GWAS
	SLE	10	6q21	PRDM1, ATG5	rs573775	T	C/T	T	ANC	Y	DiscEuro	Harley	1.19	1.12-1.27	1e-07	N	GWAS
										N	Easia	Han	1.09	0.94-1.26	0.27		GWAS
					rs548234	G	C/T	T	DER	N	DiscEasia	Han	1.25	1.17-1.33	5e-12	N	Comb
	SLE	11	7p21.3	ICA1	rs10156091	A	C/T	T	ANC	Y	DiscEuro	Harley	1.32	1.19-1.47	2e-07	N	GWAS
										N	Easia	Han	0.96	0.67-1.37	0.81		GWAS
	SLE	12	7p21.3	XKR6	rs6985109	G	A/G	A	DER	Y	DiscEuro	Harley	1.23	1.16-1.30	3e-11	N	GWAS
										N	Easia	Han	0.97	0.62-1.52	0.88	Shift	GWAS
	SLE	13	8p23.1	-	rs10903340	C	G/T	T	DER	Y	DiscEuro	Harley	1.18	1.11-1.25	1e-07	N	GWAS
										N	Easia	Han	0.98	0.68-1.42	0.92	Shift	GWAS
	SLE	14	8q12	LYN	rs7829816	A	A/G	G	DER	Y	DiscEuro	Harley	0.77	0.70-0.84	5e-09	N	GWAS
										N	Easia	Han	0.97	0.63-1.50	0.89		GWAS
	SLE	15	22q11.21	HIC2, UBE2L3	rs5754217	A	G/T	T	ANC	Y	DiscEuro	Harley	1.22	1.14-1.32	8e-08	N	GWAS
										N	Easia	Han	1.34	1.16-1.53	4e-05		GWAS
					rs463426	A	C/T	T	DER	N	DiscEasia	Han	0.78	0.74-0.83	2e-16	N	Comb
	SLE	16	22q13.2	SCUBE1	rs2071725	G	A/G	G	ANC	Y	DiscEuro	Harley	0.78	0.72-0.86	1e-07	N	GWAS
										N	Easia	Han	1.02	0.77-1.34	0.91		GWAS
	SLE	17	4q24	BANK1	rs10516487	G	C/T	C	ANC	N	DiscEuro	Kozyrev	0.72	0.65-0.80	4e-10	Y	Comb
										N	Easia	Han	0.83	0.68-1.03	0.09		GWAS
										N	Easia	Yang	0.73	-	0.0004		GWAS
	SLE	18	6q23.3	TNFAIP3	rs5029939	G	C/G	G	ANC	Y	DiscEuro	Graham	2.28	-	3e-12	N	GWAS
					rs2230926	C	G/T	T	DER	N	DiscEasia	Han	1.72	1.52-1.94	1e-17	N	Comb
										Y	Easia	Yang	2.77	-	3e-07		GWAS
	SLE	19	5q33.1	TNIP1	rs10036478	G	C/T	T	DER	N	DiscEasia	Han	0.81	0.75-0.87	2e-09	N	Comb
	SLE	20	2p22.3	RASGRP3	rs13385731	A	C/T	T	ANC	N	DiscEasia	Han	0.7	0.64-0.76	1e-15	N	Comb
	SLE	21	7p12.2	IKZF1	rs4917014	A	G/T	T	ANC	N	DiscEasia	Han	0.72	0.68-0.77	3e-23	N	Comb
	SLE	22	7q11.23	Multiple	rs1167796	G	A/G	A	DER	N	DiscEasia	Han	0.83	0.78-0.89	2e-08	N	Comb
	SLE	23	10q11.22	WDFY4, LRRC18	rs1913517	A	A/G	A	ANC	N	DiscEasia	Han	1.24	1.17-1.32	7e-12	N	Comb
										N	Easia	Yang	1.41	-	0.0002		GWAS
					rs7097397	G	A/G	G	ANC	N	DiscEasia	Yang	1.3	1.21-1.40	8e-12	N	Comb
	SLE	24	11q23.3	Multiple	rs4639966	G	C/T	T	DER	N	DiscEasia	Han	1.29	1.22-1.37	1e-16	N	Comb
	SLE	25	11q24.3	ETS1	rs6590330	A	A/G	G	DER	N	DiscEasia	Han	1.37	1.29-1.45	2e-25	N	Comb
										N	Easia	Yang	1.48	-	9e-06		GWAS
					rs1128334	A	A/G	G	DER	N	DiscEasia	Yang	1.29	1.20-1.39	2e-11	N	Comb
	SLE	26	12q24.32	SLC15A4	rs1385374	A	C/T	C	DER	N	DiscEasia	Han	1.26	1.18-1.35	2e-11	N	Comb
	SLE	27	16p11.2	Multiple	rs7197475	A	C/T	C	ANC	N	DiscEasia	Han	1.31	1.20-1.46	3e-08	N	Comb
	SLE	28	13q14.11	ELF1	rs7329174	G	A/G	A	DER	N	DiscEasia	Yang(2)	1.26	1.16-1.36	1e-08	N	Comb
	SLE	29	1q24.2	CD247	rs704853	G	G/T	T	DER	N	DiscEasia	Li	0.81	0.75-0.88	2e-07	N	Comb
										N	Euro	Hom	0.93	-	0.08		GWAS
										N	Euro	Harley	0.79	-	0.11		GWAS
	T2D	1	10q25.2	TCF7L2	rs7903146	T	C/T	T	DER	Y	DiscEuro	Zeggini	1.37	1.25-1.49	7e-13		GWAS
										N	Euro	Scott	1.39	1.20-1.61	1e-05		GWAS
										N	Euro	Saxena	1.33	1.17-1.50	5e-06		GWAS
										Y	Euro	Steinthorsdottir	1.38	-	2e-10		GWAS
										Y	Euro	DIAGRAM	1.37	1.28-1.47	3e-23		GWAS
										Y	Euro	DIAGRAM+	1.4	1.34-1.46	2e-51		GWAS
										N	Easia	Takeuchi	1.54	1.36-1.74	8e-12		Comb
										N	Easia	Yamauchi	1.39	-	2e-08		Comb
										N	Easia	Tsai	-	-	0.32		GWAS
										N	Easia	Sim	1.14	0.83-1.54	0.4		GWAS
										N	Easia	Cui	1.53	-	0.019		GWAS
										N	Easia	Cho	1.16	1.02-1.31	0.025		GWAS
										N	Africa	Lettre	1.33	1.26-1.38	2.79e-07		GWAS
										N	Africa	Palmer	1.33	1.16-1.53	4.9e-05		GWAS
					rs7901695	C	C/T	C	ANC	N	DiscEasia	Yamauchi	1.41	1.26-1.58	5e-09	N	Comb
										N	Easia	Shu	1.41	1.03-1.93	0.017		GWAS
										N	Easia	Cui	1.53	-	0.019		GWAS
										N	Africa	Lettre	0.81	0.76-0.86	7.5e-06	Shift	GWAS
	T2D	2	16q12.2	FTO	rs8050136	A	A/C	A	ANC	Y	DiscEuro	Zeggini	1.22	1.12-1.32	1e-12	N	Rep
										N	Euro	Scott	1.03	0.92-1.16	0.58		GWAS
										N	Euro	DIAGRAM	1.15	1.09-1.22	7e-06		GWAS
										Y	Euro	DIAGRAM+	1.13	1.08-1.18	3e-08		GWAS
										N	Easia	Takeuchi	1.11	0.98-1.26	0.09		GWAS
										N	Easia	Tsai	-	-	0.2		GWAS
										N	Easia	Yamauchi	1.08	-	0.032		GWAS
										N	Easia	Shu	0.98	0.81-1.19	0.57		GWAS
										N	Easia	Cui	1.2	-	0.09		GWAS
										N	Easia	Cho	-	-	1e-07		GWAS
										N	Africa	Lettre	0.99	0.94-1.04	0.8		GWAS
										N	Africa	Palmer	0.95	0.84-1.08	0.42		GWAS
					rs11642841	A	A/C	C	DER	Y	DiscEuro	DIAGRAM+	1.13	1.08-1.18	3e-08	N	GWAS
	T2D	3	6p22.3	CDKAL1	rs10946398	C	A/C	C	ANC	N	DiscEuro	Zeggini	1.14	1.07-1.22	1e-08	N	Rep
										N	Easia	Shu	1.2	1.06-1.36	0.002		GWAS
										N	Easia	Cho	-	-	2e-14		GWAS
										N	Africa	Lettre	0.98	0.93-1.03	0.61	Shift	GWAS
										N	Africa	Palmer	1.11	0.98-1.27	0.11	Shift	GWAS
					rs7756992	G	A/G	G	ANC	N	DiscEuro	Steinthorsdottir	0.83	0.79-0.88	8e-09	Y	Comb
										Y	Easia	Takeuchi	1.35	1.23-1.50	5e-09	Shift	GWAS
										N	Easia	Yamauchi	1.07	-	2e-12	Shift	Comb
										N	Easia	Tsai	-	-	0.51		GWAS
										N	Easia	Cui	1.02	-	0.73	Shift	GWAS
										N	Easia	Cho	-	-	1e-06		GWAS
										N	Africa	Lettre	0.97	0.92-1.02	0.5		GWAS
					rs6931514	G	A/G	A	DER	Y	DiscEuro	DIAGRAM	1.25	1.17-1.33	1e-11	N	GWAS
										N	Africa	Lettre	1.02	0.98-1.08	0.76		GWAS
					rs4712524	G	A/G	A	DER	N	DiscEasia	Unoki	1.22	1.15-1.31	3e-10	N	Rep
					rs4712523	G	A/G	A	DER	Y	DiscEasia	Takeuchi	1.23	1.16-1.30	7e-20	Y	Rep
										N	Easia	Cho	-	-	3e-14		GWAS
										N	Africa	Lettre	0.97	0.92-1.02	0.5	Shift	GWAS
					rs2206734	T	C/T	C	DER	Y	DiscEasia	Yamauchi	1.2	1.14-1.26	2e-13	N	Comb
										N	Easia	Cho	-	-	2e-10		GWAS
					rs7754840	C	C/G	G	DER	Y	DiscEuro	DIAGRAM+	1.18	1.13-1.24	3e-15	N	GWAS
										N	Easia	Sim	1.2	1.09-1.31	0.0001		GWAS
										N	Easia	Cui	1.07	-	0.32		GWAS
										N	Easia	Cho	-	-	1e-14		GWAS
										N	Africa	Lettre	0.97	0.92-1.02	0.59	Shift	GWAS
	T2D	4	9p21.3	CDKN2A/B	rs10811661	T	C/T	C	DER	N	DiscEuro	Zeggini	0.85	0.78-0.93	5e-07	Y	Rep
										N	Euro	Scott	0.85	0.72-1.02	0.08		GWAS
										N	Euro	Saxena	0.73	0.63-0.84	4e-05		GWAS
										Y	Euro	DIAGRAM+	0.84	0.79-0.89	1e-10		GWAS
										Y	Easia	Takeuchi	0.74	0.67-0.83	2e-08		GWAS
										N	Easia	Shu	1.24	1.10-1.40	0.0003	Shift	GWAS
										N	Easia	Cho	0.83	0.78-0.88	6e-11		GWAS
										N	Africa	Palmer	0.95	0.73-1.22	0.67		GWAS
					rs2383208	A	A/G	G	DER	Y	DiscEasia	Takeuchi	0.75	0.70-0.79	2e-29	Y	Rep
										N	Easia	Yamauchi	0.84	0.81-0.88	1e-11		Comb
										N	Easia	Cho	-	-	3e-14		GWAS
										N	Africa	Palmer	1.1	0.94-1.28	0.24		GWAS
	T2D	5	3q27.2	IGF2BP2	rs4402960	T	G/T	G	DER	Y	DiscEuro	Saxena	1.18	1.12-1.25	2e-09	N	Rep
										N	Euro	Zeggini	1.15	1.05-1.25	0.002		GWAS
										N	Euro	Scott	1.28	1.13-1.45	0.0001		GWAS
										N	Easia	Takeuchi	1.14	1.08-1.21	1e-06		Comb
										N	Easia	Tsai	-	-	0.22		GWAS
										N	Easia	Shu	1.28	1.12-1.49	0.0002		GWAS
										N	Easia	Cui	1.08	-	0.31		GWAS
										N	Easia	Cho	-	-	0.009		GWAS
										N	Africa	Lettre	1.06	1.01-1.11	0.2		GWAS
										N	Africa	Palmer	0.97	0.86-1.10	0.66		GWAS
					rs6769511	C	C/T	C	ANC	N	DiscEasia	Unoki	1.23	1.15-1.31	1e-09	N	Rep
										N	Easia	Cho	-	-	4e-07		GWAS
										N	Africa	Lettre	0.95	0.89-1.01	0.33	Shift	GWAS
					rs1470579	C	A/C	C	ANC	Y	DiscEuro	DIAGRAM+	1.14	1.09-1.19	3e-09	N	GWAS
										N	Easia	Yamauchi	1.15	1.09-1.21	5e-08		Comb
										N	Easia	Sim	1.15	1.04-1.28	0.006		GWAS
										N	Easia	Cui	1.1	-	0.22		GWAS
										N	Easia	Cho	-	-	6e-07		GWAS
	T2D	6	11p15.1	KCNJ11	rs5219	T	C/T	C	DER	N	DiscEuro	Saxena	1.14	1.08-1.21	1e-07	N	Rep
										N	Euro	Scott	1.2	1.07-1.36	0.002		GWAS
										N	Easia	Takeuchi	1.07	1.01-1.13	0.015		Comb
										N	Easia	Cui	0.94	-	0.35		GWAS
					rs5215	C	C/T	T	DER	Y	DiscEuro	Zeggini	1.14	1.10-1.19	5e-11	N	Comb
										N	Euro	DIAGRAM+	1.09	1.05-1.14	2e-05		GWAS
										N	Easia	Yamauchi	1.05	-	0.19		GWAS
										N	Easia	Shu	1.21	1.07-1.37	0.001		GWAS
										N	Easia	Sim	1.1	1.01-1.21	0.036		GWAS
										N	Easia	Cui	0.94	-	0.38		GWAS
										N	Easia	Cho	1.13	1.08-1.18	2e-07		GWAS
										N	Africa	Lettre	1.08	0.99-1.17	0.34		GWAS
										N	Africa	Palmer	0.92	0.73-1.15	0.45		GWAS
	T2D	7	7p15.1	JAZF1	rs864745	T	C/T	T	ANC	N	DiscEuro	DIAGRAM	1.11	1.07-1.14	5e-14	N	Comb
										Y	Euro	DIAGRAM+	1.12	1.08-1.16	2e-08		GWAS
										N	Easia	Takeuchi	0.93	0.82-1.05	0.24	Shift	GWAS
										N	Easia	Shu	0.97	0.84-1.13	0.64	Shift	GWAS
										N	Easia	Sim	1	0.89-1.11	0.94	Shift	GWAS
										N	Easia	Cui	0.97	-	0.7	Shift	GWAS
										N	Easia	Cho	0.94	0.89-1.00	0.025	Shift	GWAS
										N	Africa	Lettre	0.96	0.91-1.01	0.32	Shift	GWAS
										N	Africa	Palmer	0.88	0.79-1.02	0.09	Shift	GWAS
	T2D	8	10p13	CDC123, CAMK1D	rs12779790	G	A/G	A	DER	N	DiscEuro	DIAGRAM	1.09	1.06-1.12	1e-10	N	Comb
										N	Euro	DIAGRAM+	1.09	1.04-1.15	0.0007		GWAS
										N	Easia	Takeuchi	0.98	0.85-1.13	0.8		GWAS
										N	Easia	Shu	1.04	0.88-1.23	0.31		GWAS
										N	Easia	Cho	1.12	1.02-1.23	0.013		GWAS
										N	Africa	Lettre	1.1	1.03-1.18	0.2		GWAS
										N	Africa	Palmer	1.05	0.87-1.25	0.63		GWAS
					rs10906115	A	A/G	G	DER	N	DiscEasia	Shu	0.89	0.85-0.93	1e-08	Y	Comb
										N	Easia	Cui	0.86	-	0.039		GWAS
										N	Easia	Cho	0.92	0.88-0.96	0.0003		GWAS
	T2D	9	12q21.1	TSPAN8, LGR5	rs7961581	C	C/T	C	ANC	N	DiscEuro	DIAGRAM	1.09	1.06-1.12	1e-09	N	Comb
										N	Euro	DIAGRAM+	1.11	1.07-1.14	2e-05		GWAS
										N	Easia	Takeuchi	1.12	0.99-1.27	0.08		GWAS
										N	Easia	Shu	0.96	0.82-1.12	0.71		GWAS
										N	Easia	Sim	0.98	0.88-1.09	0.74		GWAS
										N	Easia	Cho	1.01	0.95-1.06	0.85		GWAS
										N	Africa	Lettre	0.99	0.93-1.05	0.9	Shift	GWAS
										N	Africa	Palmer	0.99	0.86-1.18	0.92	Shift	GWAS
	T2D	10	2	THADA	rs7578597	T	C/T	T	ANC	N	DiscEuro	DIAGRAM	0.87	0.83-0.91	1e-09	Y	Comb
										N	Euro	DIAGRAM+	0.87	0.81-0.93	4e-05		GWAS
										N	Easia	Takeuchi	0.88	0.68-1.15	0.35		Comb
										N	Easia	Tsai	-	-	0.82		GWAS
										N	Easia	Sim	0.73	0.38-1.41	0.35		GWAS
										N	Easia	Cho	0.93	0.62-1.40	0.74		GWAS
										N	Africa	Lettre	0.98	0.92-1.04	0.69		GWAS
										N	Africa	Palmer	1.11	0.96-1.29	0.16		GWAS
	T2D	11	3p14.1	ADAMTS9	rs4607103	C	C/T	C	ANC	N	DiscEuro	DIAGRAM	0.92	0.89-0.94	1e-08	Y	Comb
										N	Euro	DIAGRAM+	0.91	0.87-0.96	0.0002		GWAS
										N	Easia	Takeuchi	0.92	0.83-1.01	0.09		GWAS
										N	Easia	Shu	1.03	0.91-1.17	0.3		GWAS
										N	Easia	Sim	0.97	0.85-1.09	0.52		GWAS
										N	Easia	Cui	1.02	-	0.76		GWAS
										N	Easia	Cho	0.99	0.95-1.04	0.67		GWAS
										N	Africa	Lettre	0.98	0.93-1.03	0.38	Shift	GWAS
										N	Africa	Palmer	0.92	0.81-1.05	0.22	Shift	GWAS
	T2D	12	1p12	NOTCH2	rs10923931	T	G/T	G	DER	N	DiscEuro	DIAGRAM	1.13	1.08-1.17	4e-08	N	Comb
										N	Euro	DIAGRAM+	1.14	1.07-1.21	7e-05		GWAS
										N	Easia	Takeuchi	1.17	0.83-1.65	0.38		GWAS
										N	Easia	Shu	1.02	0.71-1.48	0.45		GWAS
										N	Easia	Sim	0.93	0.71-1.22	0.59		GWAS
										N	Easia	Cui	1.71	-	0.016		GWAS
										N	Easia	Cho	1.05	0.92-1.20	0.45		GWAS
										N	Africa	Lettre	1.01	0.96-1.07	0.85		GWAS
										N	Africa	Palmer	0.93	0.81-1.05	0.24		GWAS
	T2D	13	11p15.5	KCNQ1	rs2237892	C	C/T	C	ANC	N	DiscEasia	Yasuda	0.7	0.67-0.75	3e-40	Y	Rep
										N	Euro	DIAGRAM+	0.88	0.80-0.95	0.003		GWAS
										N	Easia	Takeuchi	0.8	0.72-0.88	2e-05		GWAS
										Y	Easia	Yamauchi	0.8	0.76-0.84	7e-18		Comb
										N	Easia	Sim	0.99	0.90-1.09	0.87		GWAS
										Y	Easia	Cho	0.85	0.81-0.90	5e-09		GWAS
										N	Africa	Lettre	1.08	1.00-1.16	0.38		GWAS
										N	Africa	Palmer	0.99	0.80-1.23	0.96		GWAS
					rs2283228	A	A/C	A	ANC	N	DiscEasia	Unoki	0.79	0.75-0.85	3e-11	Y	Rep
										N	Easia	Shu	0.86	0.77-0.97	0.003		GWAS
					rs2237895	C	A/C	A	DER	N	DiscEasia	Tsai	1.3	1.17-1.45	1e-09	N	Rep
					rs231362	G	A/G	A	DER	N	DiscEuro	DIAGRAM+	0.93	0.92-0.95	3e-13	Y	Rep
										N	Easia	Sim	0.97	0.83-1.13	0.69		GWAS
										N	Easia	Cho	0.91	0.83-1.00	0.039		GWAS
										N	Africa	Palmer	0.96	0.80-1.15	0.68		GWAS
					rs163182	C	C/G	G	DER	N	DiscEasia	Cui	1.31	1.20-1.42	2e-17	N	Rep
	T2D	14	9p24.1	PTPRD	rs17584499	T	C/T	C	DER	N	DiscEasia	Tsai	1.61	1.33-1.95	9e-10	N	Rep
										N	Easia	Shu	0.97	0.71-1.32	0.58		GWAS
										N	Easia	Sim	1	0.87-1.16	0.99		GWAS
										N	Easia	Cui	1.18	-	0.16		GWAS
										N	Easia	Cho	1.09	1.01-1.18	0.036		GWAS
	T2D	15	17p13.3	SRR	rs391300	G	C/T	C	ANC	N	DiscEasia	Tsai	0.79	0.71-0.88	3e-09	Y	Rep
										N	Easia	Shu	1.04	0.91-1.20	0.74		GWAS
										N	Easia	Sim	1.01	0.93-1.11	0.77		GWAS
										N	Easia	Cui	0.98	-	0.74		GWAS
										N	Easia	Cho	0.97	0.92-1.03	0.3		GWAS
	T2D	16	2q24	RBMS1, ITGB6	rs7593730	C	C/T	C	DER	N	DiscEuro	Qi	0.92	0.88-0.96	4e-08	N	Rep
										N	Easia	Shu	1.04	0.88-1.22	0.33		GWAS
										N	Easia	Cho	0.97	0.92-1.03	0.4		GWAS
	T2D	17	4p16.1	WFS1	rs1801214	T	C/T	C	DER	Y	DiscEuro	DIAGRAM+	1.13	1.08-1.18	3e-08	N	GWAS
	T2D	18	8q24	SLC30A8	rs13266634	C	C/T	C	ANC	Y	DiscEuro	DIAGRAM+	0.87	0.83-0.92	2e-08		GWAS
										N	Easia	Takeuchi	0.82	0.78-0.86	2e-14		Comb
										N	Easia	Tsai	-	-	0.29		GWAS
										N	Easia	Yamauchi	0.91	-	0.006		GWAS
										N	Easia	Shu	0.84	0.74-0.96	0.004		GWAS
										N	Easia	Sim	0.93	0.85-1.02	0.11		GWAS
										N	Easia	Cui	0.96	-	0.61		GWAS
										N	Easia	Cho	0.9	0.86-0.94	9e-06		GWAS
										N	Africa	Lettre	0.95	0.86-1.04	0.53		GWAS
										N	Africa	Palmer	0.89	0.70-1.14	0.36		GWAS
	T2D	19	10q23.33	IDE, HHEX	rs5015480	C	C/T	C	ANC	Y	DiscEuro	DIAGRAM+	0.85	0.81-0.89	1e-15	Y	GWAS
										N	Easia	Tsai	-	-	0.15		GWAS
										N	Easia	Shu	1.42	1.20-1.66	9e-06	Shift	GWAS
										N	Easia	Cui	1.07	-	0.44	Shift	GWAS
										N	Easia	Cho	-	-	4e-08		GWAS
										N	Africa	Lettre	0.96	0.91-1.01	0.58	Shift	GWAS
										N	Africa	Palmer	1.08	0.95-1.23	0.25	Shift	GWAS
	T2D	20	2q36.3	IRS1	rs7578326	A	A/G	A	ANC	N	DiscEuro	DIAGRAM+	0.91	0.88-0.93	5e-20	Y	Rep
										N	Easia	Cui	1.05	-	0.57		GWAS
	T2D	21	2	BCL11A	rs243021	A	A/G	G	DER	N	DiscEuro	DIAGRAM+	1.08	1.06-1.10	3e-15	N	Rep
										N	Easia	Sim	1.05	0.96-1.16	0.29	Shift	GWAS
										N	Easia	Cui	1.07	-	0.4		GWAS
										N	Africa	Palmer	0.9	0.80-1.03	0.12	Shift	GWAS
	T2D	22	5	ZBED3	rs4457053	G	A/G	A	DER	Y	DiscEuro	DIAGRAM+	1.07	1.04-1.10	3e-12	N	Rep
										N	Easia	Sim	1.01	0.84-1.22	0.93		GWAS
										N	Easia	Cho	1	0.85-1.18	0.98		GWAS
	T2D	23	7	KLF14	rs972283	G	A/G	G	ANC	N	DiscEuro	DIAGRAM+	0.94	0.92-0.97	2e-10	Y	Rep
										N	Easia	Cho	1.01	0.94-1.08	0.85		GWAS
										N	Africa	Palmer	0.96	0.78-1.17	0.67		GWAS
	T2D	24	8	TP53INP1	rs896854	T	C/T	T	ANC	N	DiscEuro	DIAGRAM+	1.05	1.03-1.08	1e-09	N	Rep
										N	Easia	Sim	1.05	0.95-1.16	0.34		GWAS
										N	Easia	Cui	1.26	-	0.002		GWAS
										N	Easia	Cho	1.07	1.02-1.12	0.009		GWAS
										N	Africa	Palmer	0.95	0.82-1.09	0.45		GWAS
	T2D	25	9	CHCHD9	rs13292136	C	C/T	C	ANC	N	DiscEuro	DIAGRAM+	0.93	0.88-0.96	3e-08	Y	Rep
										N	Easia	Sim	1.14	0.97-1.32	0.13		GWAS
										N	Easia	Cho	1.01	0.94-1.08	0.88		GWAS
										N	Africa	Palmer	1.01	0.81-1.25	0.97		GWAS
	T2D	26	11	CENTD2	rs1552224	A	A/C	A	ANC	N	DiscEuro	DIAGRAM+	0.88	0.85-0.90	1e-22	Y	Rep
										N	Easia	Sim	0.74	0.61-0.89	0.001		GWAS
										N	Easia	Cui	0.77	-	0.042		GWAS
										N	Easia	Cho	0.86	0.79-0.94	0.002		GWAS
										N	Africa	Palmer	1.21	0.83-1.77	0.32		GWAS
	T2D	27	12	HMGA2	rs1531343	C	C/G	G	DER	N	DiscEuro	DIAGRAM+	1.08	1.04-1.12	4e-09	N	Rep
										N	Easia	Sim	1.09	0.95-1.27	0.23		GWAS
										N	Easia	Cho	1.06	0.99-1.14	0.11		GWAS
										N	Africa	Palmer	1.02	0.90-1.16	0.78		GWAS
	T2D	28	12	HNF1A	rs7957197	T	A/T	T	ANC	N	DiscEuro	DIAGRAM+	0.95	0.92-0.98	2e-08	Y	Rep
										N	Africa	Palmer	0.97	0.80-1.17	0.73		GWAS
	T2D	29	15	ZFAND6	rs11634397	G	A/G	A	DER	N	DiscEuro	DIAGRAM+	0.95	0.93-0.98	2e-09	Y	Rep
										N	Easia	Sim	1.11	0.94-1.31	0.23	Shift	GWAS
										N	Easia	Cho	0.99	0.90-1.09	0.83	Shift	GWAS
										N	Africa	Palmer	0.86	0.75-0.97	0.016	Shift	GWAS
	T2D	30	15	PRC1	rs8042680	A	A/C	A	ANC	N	DiscEuro	DIAGRAM+	1.06	1.03-1.08	2e-10	N	Rep
										N	Easia	Sim	1.12	0.48-2.65	0.79		GWAS
										N	Easia	Cho	1.64	1.16-2.32	0.005		GWAS
										N	Africa	Palmer	0.91	0.76-1.09	0.33	Shift	GWAS
	T2D	31	11	MTNR1B	rs1387153	T	C/T	C	DER	N	DiscEuro	DIAGRAM+	1.08	1.05-1.10	8e-15	N	Rep
										N	Easia	Yamauchi	1.05	-	0.19		GWAS
										N	Easia	Cui	1.09	-	0.27		GWAS
	T2D	32	3	UBE2E2	rs6780569	G	A/G	G	ANC	N	DiscEasia	Yamauchi	0.83	0.77-0.88	7e-09	Y	Comb
										N	Easia	Sim	0.89	0.80-1.00	0.06		GWAS
										N	Easia	Cho	0.88	0.83-0.93	2e-05		GWAS
	T2D	33	15q22.2	C2CD4A/B	rs7172432	A	A/G	G	DER	N	DiscEasia	Yamauchi	0.88	0.83-0.92	7e-08	Y	Comb
										N	Easia	Sim	0.88	0.81-0.97	0.011		GWAS
										N	Easia	Cui	0.77	-	0.0003		GWAS
										N	Easia	Cho	0.92	0.87-0.96	0.0001		GWAS
	T2D	34	13q31.1	SPRY2	rs1359790	G	A/G	G	ANC	N	DiscEasia	Shu	0.87	0.83-0.91	6e-09	Y	Comb
										N	Easia	Cho	0.98	0.93-1.03	0.37		GWAS
	T2D	35	2	RND3-RBM43	rs7560163	C	C/G	G	DER	N	DiscAfri	Palmer	0.75	0.67-0.84	7e-09	Y	Comb
	T2D	36	4	MAEA	rs6815464	C	C/G	C	ANC	N	DiscEasia	Cho	0.86	0.83-0.91	2e-20	Y	Rep
	T2D	37	9	GLIS3	rs7041847	A	A/G	A	ANC	N	DiscEasia	Cho	1.11	1.07-1.15	2e-14	N	Rep
	T2D	38	20q13.1	HNF4A	rs6017317	G	G/T	G	ANC	N	DiscEasia	Cho	1.1	1.06-1.14	1e-11	N	Rep
	T2D	39	7	GCC1-PAX4	rs6467136	G	A/G	G	ANC	N	DiscEasia	Cho	0.91	0.87-0.95	5e-11	Y	Rep
	T2D	40	3	PSMD6	rs831571	C	C/T	C	ANC	N	DiscEasia	Cho	1.08	1.05-1.12	8e-11	N	Rep
	T2D	41	6	ZFAND3	rs9470794	C	C/T	C	ANC	N	DiscEasia	Cho	0.86	0.81-0.92	2e-10	Y	Rep
	T2D	42	19q13	PEPD	rs3786897	A	A/G	G	DER	N	DiscEasia	Cho	0.9	0.85-0.96	1e-08	Y	Rep
	T2D	43	6	KCNK16	rs1535500	T	G/T	G	DER	N	DiscEasia	Cho	1.06	1.02-1.10	2e-08	N	Rep
	a AD = Alcohol dependence; AMD = Age-related macular degeneration; RA = Rheumatoid arthritis; OA = Osteoarthritis; AS = Asthma; ATD = Atopic dermatitis; BP = Bipolar disorder;
	BC = Breast cancer; IS = Ischemic stroke; CrA = Cerebral aneurysm; CAD = Coronary artery disease; HT = Hypertension; UC = Ulcerative colitis; ALL = Acute lymphoblastic leukemia;
	LC = Lung cancer; MI = Myocardial infarction; NL = Narcolepsy; NHL = Non-Hodgkin lymphoma; PC = Pancreatic cancer; PD = Parkinson's disease; PrC = Prostate cancer; PS = Psoriasis;
	SZ = Schizophrenia; SSc = Scleroderma; SLE = Systemic lupus erythematosus; T2D = Type 2 diabetes;
	b This column records the allele fow which information has been recorded
	c This column indicates whether the associated SNP was genome-wide significant in the initial stage of the discovery GWAS
	d DiscEasia and DiscEuro if the GWAS discovering the SNPs was performed on individuals of East Asian or European ancestry; Euro = Ongoing GWAS with a replication attempt
	on individuals of European ancestry; Asia = Ongoing GWAS with a replication attempt on individuals of E. Asian ancestry;
	e Whether the OR of the associated allele was referenced to the minor alleles (Y/N); For those SNPs with the same associated allele in Europeans and East Asians but
	reversed OR because of divergent minor alleles we indicate by "Shift";
	f Origin of the recorded Odds Ratio (Rep. = OR taken from GWAS replication stage; Comb. = OR taken from combined analysis of GWAS and replication stages)
