# Supplementary material for: High Trans-ethnic Replicability of GWAS Results Implies Common Causal Variants
Source: PLoS Genet. 2013 Jun 13;9(6):e1003566. doi: 10.1371/journal.pgen.1003566 (PMC3681663; doi:10.1371/journal.pgen.1003566)
Supplement: Table S6 — Replicability per disease in Europeans. A) Using all replication attempts and B) Using only replication attempts with ≥80%. (XLSX) [file pgen.1003566.s006.xlsx]

## Sheet: Hoja1
	Supplementary Table 6: Replicability per disease in Europeans
	A) Using all replication attempts in Europeans
	Disease	Attempts	Replications (p<0.05)	Failed (p>0.05)	Replicability (%)	Expected by power (%)		Same direction (OR)	%
	Alcohol dependence	1	0	1	0	82		0	0
	Age macular degeneration	7	7	0	100	93		6*	100
	Rheumatoid arthritis	12	12	0	100	99		12	100
	Osteoarthritis	1	0	1	0	91		1	100
	Asthma	26	14	12	53.8462	84		13*	93	I changed torgerson of p=0.24 that is 10-6
	Atopic Dermatitis	1	1	0	100	100		1	100
	Bipolar disorder	6	5	1	83.3333	96		4*	100
	Breast cancer	9	8	1	88.8889	87		9	100
	Ischemic stroke	1	0	1	0	100		1	100
	Cerebral aneurysm	2	2	0	100	100		2	100
	Coronary artery disease	4	4	0	100	100		4	100
	Hypertension	-	-	-	-	-		-	-
	Ulcerative colitis	41	37	4	90.2439	86		29*	94
	Acute lymphoblastic leukemia	5	5	0	100	100		5	100
	Lung cancer	8	8	0	100	80		8	100
	Myocardial infarction	-	-	-	-	-		-	-
	Narcolepsy	1	1	0	100	100		1	100
	Non-Hodgkin lymphoma	-	-	-	-	-		-	-
	Pancreatic cancer	-	-	-	-	-		-	-
	Parkinson's disease	16	14	2	87.5	86		16	100
	Prostate cancer	4	4	0	100	99		4	100
	Psoriasis	6	6	0	100	94		6	100
	Schizophrenia	2	2	0	100	52		2	100
	Scleroderma	6	5	1	83.3333	83		6	100
	Systemic lupus erythematosus	1	1	0	100	100		1	100
	Type 2 diabetes	21	19	2	90.4762	90		21	100
	TOTAL	181	155	26	86	89		152*	98
	No heterogeneity across disease after accounting by statistical power (χ2 = 0.23, df = 11, P=1; using diseases with ≥5 attempts)
	B) Using replication attempts with ≥80% power to replicate OR from European discovery GWAS
	Disease	Attempts	Replications (p<0.05)	Failed (p>0.05)	Replicability (%)	Expected by power (%)		Same direction (OR)	%
	Alcohol dependence	1	0	1	0	82		0	0
	Age macular degeneration	7	7	0	100	93		6*	100
	Rheumatoid arthritis	12	12	0	100	99		12	100
	Osteoarthritis	1	0	1	0	91		1	100
	Asthma	13	8	5	62	95		10*	91
	Atopic Dermatitis	2	2	0	100	100		2	100
	Bipolar disorder	6	5	1	83	96		4*	100
	Breast cancer	7	7	0	100	100		7	100
	Ischemic stroke	1	0	1	0	100		1	100
	Cerebral aneurysm	2	2	0	100	100		2	100
	Coronary artery disease	4	4	0	100	100		4	100
	Hypertension	-	-	-	-	-		-	-
	Ulcerative colitis	29	27	2	93	95		22*	96
	Acute lymphoblastic leukemia	5	5	0	100	100		5	100
	Lung cancer	5	5	0	100	100		5	100
	Myocardial infarction	-	-	-	-	-		-	-
	Narcolepsy	1	1	0	100	100		1	100
	Non-Hodgkin lymphoma	-	-	-	-	-		-	-
	Pancreatic cancer	-	-	-	-	-		-	-
	Parkinson's disease	11	11	0	100	97		11	100
	Prostate cancer	4	4	0	100	99		4	100
	Psoriasis	6	6	0	100	94		6	100
	Schizophrenia	-	-	-	-	-		-	-
	Scleroderma	4	3	1	75	100		4	100
	Systemic lupus erythematosus	1	1	0	100	100		1	100
	Type 2 diabetes	17	16	1	94	97		17	100
	TOTAL	139	126	13	91	97		125*	98
	No heterogeneity across disease after accounting by statistical power (χ2 = 0.03, df = 10, P=0.999; using disease with ≥5 attempts)
	* Only replication attempts with available OR from discovery GWAS and replication were included (see Supp Table 4)
