# Supplementary material for: High Trans-ethnic Replicability of GWAS Results Implies Common Causal Variants
Source: PLoS Genet. 2013 Jun 13;9(6):e1003566. doi: 10.1371/journal.pgen.1003566 (PMC3681663; doi:10.1371/journal.pgen.1003566)
Supplement: Table S11 — Main features of gathered replication attempts, including candidate-based attempts, for the 6 analyzed diseases. (XLSX) [file pgen.1003566.s011.xlsx]

## Sheet: Hoja1
	Supplementary Table 11: Main features of gathered replication attempts, including candidate-based attempts for the 6 analyzed diseases
	DISa	N	SNP	Risk	Disc. Pop.	Discovery GWAS	OR	Pval	GWAS RAFb	Rep. RAFb	Rep. Pop	Replication GWAS	OR	Pval	Shiftc	Fromd	Size	Powe	NewSNPf
	AD	1	rs7590720	G	Euro	Treutlein	1.27	1e-08	0.274	0.274	Euro	Bierut	0.94	0.24		Comb	1897+1932	82
	RA	1	rs6679677	A	Euro	WTCCC	1.98	5e-26	0.115	0.115	Euro	Raychaudhuri	1.79	6e-42		GWAS	3393+12460	100
	RA	1	rs2476601	A	Euro	Plenge-NEJM	1.72	2e-11	0.117	0.117	Euro	Gregersen	1.81	5e-27		GWAS	2418+4504	100
	RA	1	rs2476601	A	Euro	Plenge-NEJM	1.72	2e-11	0.117	0.117	Euro	Stahl	1.94	9e-74		GWAS	5539+20169	100
	RA	1	rs2476601	A	Euro	Plenge-NEJM	1.72	2e-11	0.117	0.011	India	Prasad	0.94	0.76		Cand.	983+1007	53
	RA	1	rs2476601	A	Euro	Plenge-NEJM	1.72	2e-11	0.117	0.02	Africa	Hugues	1.23	0.507		Cand.	556+791	58
	RA	1	rs2476601	A	Euro	Plenge-NEJM	1.72	2e-11	0.117	0.117	Euro	Plant	1.48	6.25e-12		Cand.	3331+3000	100
	RA	2	rs3761847	G	Euro	Plenge-NEJM	1.4	4e-14	0.478	0.478	Euro	Stahl	1.13	2e-07		GWAS	5539+20169	100
	RA	2	rs3761847	G	Euro	Plenge-NEJM	1.4	4e-14	0.478	0.445	Asia	Kochi	1.05	0.12		Comb	2303+17791	100
	RA	2	rs3761847	G	Euro	Plenge-NEJM	1.4	4e-14	0.478	0.307	India	Prasad	1	0.95		Cand.	983+1007	100
	RA	2	rs3761847	G	Euro	Plenge-NEJM	1.4	4e-14	0.478	0.445	Asia	Zhu	1.28	0.0018		Cand.	576+689	96
	RA	2	rs3761847	G	Euro	Plenge-NEJM	1.4	4e-14	0.478	0.472	Africa	Hugues	1.13	0.128		Cand.	556+791	96
	RA	2	rs3761847	G	Euro	Plenge-NEJM	1.4	4e-14	0.478	0.445	Asia	Lee	1.05	0.43		Cand.	1123+1008	100
	RA	2	rs3761847	G	Euro	Plenge-NEJM	1.4	4e-14	0.478	0.445	Asia	Danoy	1.13	0.016		Cand.	1035+1702	100
	RA	2	rs881375	T	Euro	Gregersen	1.26	5e-10	0.385	0.283	Asia	Freudenberg	1.27	0.003		GWAS	801+757	80
	RA	3	rs10499194	C	Euro	Plenge-NG	0.69	3e-08	0.825	0.825	Euro	Stahl	0.91	0.0007		GWAS	5539+20169	100
	RA	3	rs10499194	C	Euro	Plenge-NG	0.69	3e-08	0.825	0.9	Africa	Hugues	1.16	0.164		Cand.	556+791	54
	RA	3	rs10499194	C	Euro	Plenge-NG	0.69	3e-08	0.825	0.825	Euro	Perdigones	0.87	0.11		Cand.	630+644	75
	RA	3	rs10499194	C	Euro	Plenge-NG	0.69	3e-08	0.825	0.95	Asia	Shimane (2)	0.77	0.00084		Cand.	3446+2344	85
	RA	3	rs10499194	C	Euro	Plenge-NG	0.69	3e-08	0.825	0.95	Asia	Danoy	0.94	0.83		Cand.	571+880	33
	RA	3	rs6920220	A	Euro	Raychaudhuri	1.24	2e-09	0.165	0.165	Euro	Stahl	1.22	9e-13		GWAS	5539+20169	100
	RA	3	rs6920220	A	Euro	Raychaudhuri	1.24	2e-09	0.165	0.16	Africa	Hugues	0.88	0.321		Cand.	556+791	53
	RA	3	rs6920220	A	Euro	Raychaudhuri	1.24	2e-09	0.165	0.165	Euro	Plant	1.08	0.093		Cand.	3331+3000	99
	RA	3	rs6920220	A	Euro	Raychaudhuri	1.24	2e-09	0.165	0.165	Euro	Dieguez-Gonzalez	1.12	0.07		Cand.	1651+1619	90
	RA	3	rs6920220	A	Euro	Raychaudhuri	1.24	2e-09	0.165	0.165	Euro	Perdigones	1.14	0.2		Cand.	630+644	53
	RA	4	rs3890745	T	Euro	Raychaudhuri	0.92	1e-07	0.668	0.668	Euro	Stahl	0.89	4e-06		GWAS	5539+20169	96
	RA	4	rs3890745	T	Euro	Raychaudhuri	0.92	1e-07	0.668	0.591	India	Prasad	0.91	0.161		Cand.	983+1007	25
	RA	4	rs3890745	T	Euro	Raychaudhuri	0.92	1e-07	0.668	0.453	Africa	Hugues	1.09	0.27	Y	Cand.	556+791	19
	RA	4	rs3890745	T	Euro	Raychaudhuri	0.92	1e-07	0.668	0.668	Euro	Kurreeman (2)	0.82	0.002		Cand.	711+1968	24
	RA	4	rs3890745	T	Euro	Raychaudhuri	0.92	1e-07	0.668	0.453	Africa	Kurreeman (2)	1.14	0.07	Y	Cand.	440+795	17
	RA	4	rs3890745	T	Euro	Raychaudhuri	0.92	1e-07	0.668	0.512	Asia	Kurreeman (2)	0.88	5.34e-05		Cand.	2414+14245	73
	RA	4	rs3890745	T	Euro	Raychaudhuri	0.92	1e-07	0.668	0.512	Asia	Danoy	0.79	3e-05		Cand.	1035+1702	32
	RA	5	rs2812378	G	Euro	Raychaudhuri	1.1	3e-07	0.35	0.35	Euro	Stahl	1.1	0.0001		GWAS	5539+20169	99
	RA	5	rs2812378	G	Euro	Raychaudhuri	1.1	3e-07	0.35	0.35	Euro	Kurreeman	1.08	0.24		Cand.	871+1212	30
	RA	5	rs2812378	G	Euro	Raychaudhuri	1.1	3e-07	0.35	0.467	Africa	Hugues	1.1	0.232		Cand.	556+791	22
	RA	5	rs2812378	G	Euro	Raychaudhuri	1.1	3e-07	0.35	0.35	Euro	Plant	1.04	0.251		Cand.	3331+3000	71
	RA	5	rs2812378	G	Euro	Raychaudhuri	1.1	3e-07	0.35	0.052	Asia	Lee	1.18	0.18		Cand.	1123+1008	11
	RA	5	rs2812378	G	Euro	Raychaudhuri	1.1	3e-07	0.35	0.052	Asia	Danoy	0.92	0.62		Cand.	571+880	9
	RA	5	rs951005	A	Euro	Stahl	0.87	4e-10	0.823	0.823	Euro	Kurreeman	0.85	0.05		Cand.	871+1212	33	Y
	RA	6	rs1678542	C	Euro	Raychaudhuri	0.92	9e-08	0.606	0.606	Euro	Stahl	0.91	0.0002		GWAS	5539+20169	97
	RA	6	rs1678542	C	Euro	Raychaudhuri	0.92	9e-08	0.606	0.606	Euro	Kurreeman	0.95	0.46		Cand.	871+1212	25
	RA	6	rs1678542	C	Euro	Raychaudhuri	0.92	9e-08	0.606	0.606	Euro	Plant	0.92	0.023		Cand.	3331+3000	62
	RA	6	rs1678542	C	Euro	Raychaudhuri	0.92	9e-08	0.606	0.606	Euro	Barton	0.91	0.0004		Cand.	4106+11238	93
	RA	6	rs1678542	C	Euro	Raychaudhuri	0.92	9e-08	0.606	0.214	Asia	Danoy	1.05	0.61	Y	Cand.	571+880	15
	RA	7	rs4810485	G	Euro	Raychaudhuri	0.91	8e-09	0.752	0.752	Euro	Stahl	0.85	3e-09		GWAS	5539+20169	96
	RA	7	rs4810485	G	Euro	Raychaudhuri	0.91	8e-09	0.752	0.597	Asia	Kochi	1.06	0.06		Comb	2303+19278	84
	RA	7	rs4810485	G	Euro	Raychaudhuri	0.91	8e-09	0.752	0.752	Euro	Kurreeman	0.81	0.01		Cand.	871+1212	23
	RA	7	rs4810485	G	Euro	Raychaudhuri	0.91	8e-09	0.752	0.953	Africa	Hugues	1.02	0.908		Cand.	556+791	8
	RA	7	rs4810485	G	Euro	Raychaudhuri	0.91	8e-09	0.752	0.752	Euro	Plant	0.91	0.033		Cand.	3331+3000	58
	RA	7	rs4810485	G	Euro	Raychaudhuri	0.91	8e-09	0.752	0.597	Asia	Lee	1.06	0.39		Cand.	1123+1008	31
	RA	7	rs4810485	G	Euro	Raychaudhuri	0.91	8e-09	0.752	0.597	Asia	Danoy	1.05	0.7		Cand.	571+880	22
	RA	8	rs13031237	A	Euro	Gregersen	1.25	3e-14	0.381	0.381	Euro	Stahl	1.13	8e-07		GWAS	5539+20169	100
	RA	8	rs13031237	A	Euro	Gregersen	1.25	3e-14	0.381	0.04	Asia	Kochi	0.94	0.45		Comb	2303+19232	84
	RA	8	rs13031237	A	Euro	Gregersen	1.25	3e-14	0.097	0.04	India	Prasad	0.92	0.42		Cand.	983+1007	30
	RA	8	rs13031237	A	Euro	Gregersen	1.25	3e-14	0.085	0.04	Africa	Hugues	1.2	0.185		Cand.	556+791	21
	RA	8	rs13031237	A	Euro	Gregersen	1.25	3e-14	0.381	0.381	Euro	Plant	1.16	5.26e-05		Cand.	3331+3000	100
	RA	8	rs13031237	A	Euro	Gregersen	1.25	3e-14	0.381	0.04	Asia	Danoy	0.77	0.37		Cand.	571+880	22
	RA	9	rs231735	G	Euro	Gregersen	0.86	6e-09	0.509	0.509	Euro	Plant	0.98	0.647		Cand.	3331+3000	97	Y
	RA	9	rs3087243	G	Euro	Stahl	0.87	1e-08	0.54	0.78	Africa	Hugues	0.75	0.003		Cand.	556+791	27	Y
	RA	9	rs3087243	G	Euro	Stahl	0.87	1e-08	0.54	0.54	Euro	Plant	0.92	0.024		Cand.	3331+3000	96	Y
	RA	9	rs3087243	G	Euro	Stahl	0.87	1e-08	0.54	0.54	Euro	Daha	0.87	0.041		Cand.	877+866	49	Y
	RA	9	rs3087243	G	Euro	Stahl	0.87	1e-08	0.54	0.76	Asia	Danoy	0.71	4.4e-05		Cand.	1035+1702	24	Y
	RA	10	rs2736340	A	Euro	Gregersen	1.19	6e-09	0.239	0.239	Euro	Stahl	1.12	2e-05		GWAS	5539+20169	100
	RA	10	rs2736340	A	Euro	Gregersen	1.19	6e-09	0.239	0.725	Asia	Freudenberg	0.79	0.004	Y	GWAS	801+757	47
	RA	10	rs2736340	A	Euro	Gregersen	1.19	6e-09	0.239	0.318	India	Prasad	1.11	0.12		Cand.	983+1007	70
	RA	10	rs2736340	A	Euro	Gregersen	1.19	6e-09	0.239	0.239	Euro	Orozco (3)	1.11	0.0003		Cand.	3962+9275	100
	RA	11	rs3093024	T	Asia	Kochi	1.16	8e-19	0.385	0.385	Asia	Freudenberg	1.23	0.004		GWAS	801+757	49
	RA	11	rs3093023	A	Euro	Stahl	1.11	2e-11	0.406	0.38	Asia	Freudenberg	1.24	0.003		GWAS	801+757	28
	RA	11	rs3093023	A	Euro	Stahl	1.11	2e-11	0.406	0.449	India	Prasad	1.13	0.07		Cand.	983+1007	35
	RA	11	rs3093023	A	Euro	Stahl	1.11	2e-11	0.406	0.406	Euro	Kurreeman	1.16	0.02		Cand.	871+1212	35
	RA	11	rs3093023	A	Euro	Stahl	1.11	2e-11	0.406	0.142	Africa	Hugues	1.27	0.035		Cand.	556+791	15
	RA	12	rs7574865	T	Euro	Stahl	1.16	3e-07	0.234	0.349	Asia	Kochi	1.17	2e-06		Comb	2303+19278	100
	RA	12	rs7574865	T	Euro	Stahl	1.16	3e-07	0.234	0.347	India	Prasad	1.07	0.33		Cand.	983+1007	58
	RA	12	rs7574865	T	Euro	Stahl	1.16	3e-07	0.234	0.234	Euro	Plant	1.17	0.0003		Cand.	3331+3000	94
	RA	12	rs7574865	T	Euro	Stahl	1.16	3e-07	0.234	0.349	Asia	Lee (2)	1.18	0.0004		Cand.	1123+1008	60
	RA	12	rs7574865	T	Euro	Stahl	1.16	3e-07	0.234	0.234	Euro	Daha	1.19	0.031		Cand.	877+866	45
	RA	12	rs7574865	T	Euro	Stahl	1.16	3e-07	0.234	0.151	Africa	Kelley	1.22	0.23		Cand.	723+690	30
	RA	12	rs7574865	T	Euro	Stahl	1.16	3e-07	0.234	0.349	Asia	Kobayashi	1.27	8.4e-09		Cand.	3567+2199	95
	RA	12	rs7574865	T	Euro	Stahl	1.16	3e-07	0.234	0.234	Euro	Orozco (2)	1.25	9.79e-06		Cand.	2072+2474	84
	RA	12	rs7574865	T	Euro	Stahl	1.16	3e-07	0.234	0.234	Euro	Suarez-Gestal	1.14	0.028		Cand.	1635+1906	74
	RA	12	rs7574865	T	Euro	Stahl	1.16	3e-07	0.234	0.349	Asia	Danoy	1.04	0.33		Cand.	1035+1702	68
	RA	13	rs934734	G	Euro	Stahl	1.13	5e-10	0.46	0.47	Africa	Hugues	1.1	0.231		Cand.	556+791	32	Y
	RA	14	rs6859219	C	Euro	Stahl	0.85	1e-11	0.83	0.84	Africa	Hugues	0.73	0.144		Cand.	556+791	27	Y
	RA	15	rs26232	C	Euro	Stahl	0.93	4e-08	0.668	0.733	Asia	Freudenberg	0.8	0.006		GWAS	801+757	15
	RA	15	rs26232	C	Euro	Stahl	0.93	4e-08	0.668	0.812	India	Prasad	0.98	0.79		Cand.	983+1007	19
	RA	15	rs26232	C	Euro	Stahl	0.93	4e-08	0.668	0.651	Africa	Hugues	0.97	0.687		Cand.	556+791	15
	RA	16	rs13315591	C	Euro	Stahl	1.13	5e-08	0.093	0.296	Africa	Hugues	0.98	0.799		Cand.	556+791	29	Y
	RA	17	rs874040	C	Euro	Stahl	1.18	1e-16	0.292	0.357	Africa	Hugues	1.02	0.771		Cand.	556+791	50	Y
	RA	18	rs10488631	C	Euro	Stahl	1.25	4e-11	0.124	0.159	India	Prasad	0.98	0.79		Cand.	983+1007	74	Y
	RA	18	rs10488631	C	Euro	Stahl	1.25	4e-11	0.124	0.124	Euro	Kurreeman	1.28	0.01		Cand.	871+1212	66	Y
	RA	18	rs10488631	C	Euro	Stahl	1.25	4e-11	0.124	0.01	Africa	Hugues	1.16	0.53		Cand.	556+791	9	Y
	RA	20	rs706778	T	Euro	Stahl	1.11	1e-11	0.403	0.403	Euro	Kurreeman	1.1	0.14		Cand.	871+1212	35	Y
	RA	20	rs706778	T	Euro	Stahl	1.11	1e-11	0.403	0.357	Africa	Hugues	1.04	0.656		Cand.	556+791	24	Y
	RA	20	rs706778	T	Euro	Stahl	1.11	1e-11	0.403	0.54	Asia	Danoy	1.04	0.52		Cand.	1035+1702	42	Y
	RA	22	rs2240335	G	Asia	Freudenberg	1.5	2e-08	0.388	0.388	Asia	Terao	-	2e-08		GWAS	1247+1486	100
	OA	1	rs7639618	C	Asia	Miyamoto	0.69	7e-11	0.55	0.823	Euro	Kerkhof	1.1	0.53		GWAS	1341+3496	100
	OA	1	rs7639618	C	Asia	Miyamoto	0.69	7e-11	0.55	0.823	Euro	Meulenbelt	0.86	0.063		Cand.	1120+2147	98
	OA	1	rs7639618	C	Asia	Miyamoto	0.69	7e-11	0.55	0.823	Euro	Valdes	0.88	0.12		Cand.	999+1166	93
	OA	1	rs7639618	C	Asia	Miyamoto	0.69	7e-11	0.55	0.55	Asia	Lee	1.1	0.41		Cand.	725+1737	100
	OA	2	rs3815148	C	Euro	Kerkhof	1.14	8e-08	0.217	0.217	Euro	Panoutsopoulou	1.07	0.08		GWAS	3177+4894	91
	NL	1	rs5770917	C	Asia	Migayawa	1.79	4e-07	0.225	0.049	Euro	Hallmayer	0.84	0.3		GWAS	807+1074	98
	NL	1	rs5770917	C	Asia	Migayawa	1.79	4e-07	0.225	0.225	Asia	Han	0.9	0.32		Cand.	1016+902	100
	NL	2	rs1154155	C	Euro	Hallmayer	1.8	2e-13	0.146	0.146	Euro	Hor	1.54	0.0002		GWAS	562+954	100
	NL	2	rs1154155	C	Euro	Hallmayer	1.8	2e-13	0.146	0.524	Asia	Han	0.68	0.0001	Y	Cand.	1016+902	100
	PS	1	rs495337	C	Euro	Capon	0.8	1e-08	0.57	0.57	Euro	Nair	0.81	0.0002		GWAS	1359+1400	85
	PS	1	rs495337	C	Euro	Capon	0.8	1e-08	0.57	0.57	Euro	Strange	0.83	2e-06		GWAS	2178+5175	99
	PS	1	rs495337	C	Euro	Capon	0.8	1e-08	0.57	0.57	Euro	Stuart	0.85	0.0007		GWAS	1831+2546	96
	PS	1	rs495337	C	Euro	Capon	0.8	1e-08	0.57	0.57	Euro	Li	0.97	0.35		Cand.	1448+1385	96
	PS	2	rs4085613	C	Asia	Zhang	0.8	7e-30	0.721	0.721	Asia	Chen	-	0.1744		Cand.	428+571	47	Y
	PS	3	rs3213094	A	Asia	Zhang	0.79	3e-26	0.516	0.19	Euro	Strange	1.39	5e-11	Y	GWAS	2178+5175	100
	PS	3	rs3213094	A	Asia	Zhang	0.79	3e-26	0.516	0.19	Euro	Bergboer	0.85	0.34	Y	Cand.	217+450	35
	PS	3	rs2082412	G	Euro	Nair	0.69	2e-28	0.805	0.805	Euro	Tung	0.69	0.00966		Cand.	833+4291	98	Y
	PS	4	rs17728338	A	Euro	Nair	1.59	1e-20	0.08	0.104	Asia	Zhang/Sun	1.5	9e-13		GWAS	2024+5495	100
	PS	4	rs17728338	A	Euro	Nair	1.59	1e-20	0.08	0.08	Euro	Tung	1.41579	0.0303		Cand.	833+4291	100
	PS	5	rs20541	G	Euro	Nair	0.79	5e-15	0.783	0.697	Asia	Zhang/Sun	0.93	0.03		GWAS	3163+6722	100
	PS	5	rs20541	G	Euro	Nair	0.79	5e-15	0.783	0.783	Euro	Strange	0.89	0.02		GWAS	2178+5175	99
	PS	5	rs20541	G	Euro	Nair	0.79	5e-15	0.783	0.783	Euro	Bowes	0.98	0.72		Cand.	217+450	29
	PS	5	rs20541	G	Euro	Nair	0.79	5e-15	0.783	0.783	Euro	Tung	0.81	0.0953		Cand.	833+4291	86
	PS	5	rs20541	G	Euro	Nair	0.79	5e-15	0.783	0.783	Euro	Eder	0.79	0.11		Cand.	342+217	26
	PS	6	rs610604	G	Euro	Nair	1.19	9e-12	0.425	0.092	Asia	Zhang/Sun	1.16	0.004		GWAS	3163+6722	92
	PS	6	rs610604	G	Euro	Nair	1.19	9e-12	0.425	0.425	Euro	Strange	1.22	7e-07		GWAS	2178+5175	99
	PS	6	rs610604	G	Euro	Nair	1.19	9e-12	0.425	0.425	Euro	Tung	1.26183	0.036		Cand.	833+4291	86
	PS	7	rs2066808	A	Euro	Nair	0.75	1e-09	0.929	0.953	Asia	Zhang/Sun	0.86	0.08		GWAS	2024+5495	70
	PS	7	rs2066808	A	Euro	Nair	0.75	1e-09	0.929	0.929	Euro	Strange	0.67	2e-07		GWAS	2178+5175	87
	PS	7	rs2066808	A	Euro	Nair	0.75	1e-09	0.929	0.929	Euro	Tung	0.7	0.0803		Cand.	833+4291	57
	PS	8	rs2201841	G	Euro	Nair	1.13	3e-08	0.296	0.702	Asia	Zhang/Sun	0.93	0.06	Y	GWAS	3163+6722	92
	PS	8	rs2201841	G	Euro	Nair	1.13	3e-08	0.296	0.296	Euro	Tung	1.25314	0.0451		Cand.	833+4291	53
	PS	8	rs2201841	G	Euro	Nair	1.13	3e-08	0.296	0.296	Euro	Einarsdottir	-	0.62		Cand.	385+516	21
	PS	8	rs2201841	G	Euro	Nair	1.13	3e-08	0.296	0.296	Euro	Safrany	-	0.62		Cand.	214+189	12
	PS	9	rs240993	A	Euro	Strange	1.25	5e-20	0.25	0.25	Euro	Bergboer	1.28	0.057		Cand.	217+450	36	Y
	PS	11	rs17716942	A	Euro	Strange	0.77	1e-13	0.797	0.797	Euro	Bergboer	0.92	0.61		Cand.	217+450	32	Y
	PS	12	rs27524	A	Euro	Strange	1.13	3e-11	0.332	0.332	Euro	Bergboer	1.34	0.019		Cand.	217+450	16	Y
														0.355932
	a AD = Alcohol dependence; RA = Rheumatoid arthritis; OA = Osteoarthritis; NL = Narcolepsy; NHL = Non-Hodgkin lymphoma; PS = Psoriasis;
	b GWAS RAF = Risk allele frequency for the GWAS population, gathered from dbSNP; Rep. RAF = Risk allele frequency for the Replication, gathered from dbSNP
	(frequency for Asian attempts correspond to the average of CHB and JPT populations; frequency for African attempts correspond to HapMap ASW when possible)
	c Whether the OR of the associated allele was referenced to the minor alleles (Y/N); For those SNPs with the same associated allele in Europeans and East Asians but reversed OR
	because of divergent minor alleles we indicate by "Shift";
	d Origin of the recorded Odds Ratio (Rep. = from GWAS replication stage; Comb. = from combined analysis of GWAS and replication stages; Cand. = Candidate study)
	e Predicted statistical power to replicate (p<0.05) the OR gathered from discovery GWAS under an additive model using the sample size and RAF from replication study
	f This column records those SNPs that have replication attempts gathered only from candidate approaches
